1 Comparative Genomics and Directed Evolution Reveal Genetic Determinants of Extreme UVC

2 Radiation Tolerance in Bacteria Recovered from the Stratosphere

3 Adam J. Ellington<sup>a</sup>, Tyler J. Schult<sup>a</sup>, Christopher R. Reisch<sup>a\*</sup>, and Brent C. Christner<sup>a#</sup>,

4 <sup>a</sup>Department of Microbiology and Cell Science, Institute of Food and Agricultural Science,

5 University of Florida, Gainesville, Florida, USA

6 #Address correspondence to Brent C. Christner, [xner@ufl.edu](mailto:xner@ufl.edu).

7 \*Present address: Christopher R. Reisch, Genomatica, San Diego, California, USA

8 Abstract – 381 words

9 Main Text – 5610 words

## 10 **Abstract**

11           Aerosolized microbes surviving transport to and in the stratosphere endure extremes of  
12 low temperature, atmospheric pressure, and relative humidity, and high shortwave ultraviolet  
13 radiation flux. However, the genetic determinants for traits enabling resistance to the  
14 combination of stresses experienced by microbes in the high atmosphere have not been  
15 systematically investigated. In this study, we examined Proteobacteria and Actinobacteria  
16 isolated from the stratosphere (18 to 29 km ASL) and that demonstrated high tolerance to  
17 desiccation (15-25% RH) and UVC radiation (UVCR;  $\lambda = 254$  nm). Closely related reference  
18 strains were more sensitive to UVCR than the stratospheric isolates, indicating that extreme  
19 resistance is not universally distributed in these phylogenetically related bacteria. Comparative  
20 genomic analyses revealed DNA repair and antioxidant defense genes in the isolates that are not  
21 possessed by the related reference strains, including genes encoding photolyase, DNA nucleases  
22 and helicases, and catalases. Directed evolution by repeated exposure to increasing doses of  
23 UVCR improved the LD<sub>90</sub> in a sensitive reference strain by ~3.5-fold. The mutations acquired in  
24 *Curtobacterium flaccumfaciens* pv. *flaccumfaciens* strain DSM 20129 incrementally increased its  
25 UVCR resistance, with the accumulation of 20 point mutations in protein coding genes  
26 increasing tolerance to a level approaching that of stratospheric isolate *Curtobacterium* sp. L6-1.  
27 The genetic basis for the increased UVCR tolerance phenotypes observed is discussed, with a  
28 specific emphasis on the role of genes involved in DNA repair and detoxification of reactive  
29 oxygen species.

## 30 **Importance**

31           Ultraviolet radiation is omnipresent in sunlight and has important biological effects on  
32 organisms. The stratosphere is the only location on Earth where microbes receive natural

33 exposure to highly mutagenic wavelengths (<280 nm) of ultraviolet radiation. Genetic studies of  
34 bacteria from an environment that selects for extreme ultraviolet radiation resistant phenotypes  
35 has expanded what is known from studies of model species (e.g., *E. coli*) and identified  
36 potentially novel protection and repair strategies. In addition to deepening understanding of  
37 ultraviolet radiation photobiology in atmospheric microbes and bacteria in general, these  
38 advancements are also highly relevant to astrobiology and space biology. The cold, dry,  
39 hypobaric, and high radiation environment of the stratosphere provides an earthly analog for thin  
40 extraterrestrial atmospheres (e.g., Mars) and is ideal for bioprospecting extremophile phenotypes  
41 that enable engineering of genetic stability and functionality in bio-based space life-support  
42 systems or any application where long-term persistence is desirable (e.g., biocontrol).

## 43 **Introduction**

44           The persistence of microbes during atmospheric transport and deposition has important  
45 implications to human health (1, 2), agriculture (3–5), meteorology (6–8), and astrobiology (9,  
46 10). Many studies have focused on microbial aerosols in the lowest layer of the troposphere,  
47 where the air is in contact with and affected by the surface (i.e., convective boundary layer,  
48 CBL). However, the composition of microbial assemblages in the CBL can be quite different  
49 from that of overlying air masses in the ‘free troposphere’ (11, 12). Importantly, environmental  
50 conditions in the CBL are unrepresentative of those at higher altitudes, where biological stresses  
51 (e.g., water loss and ultraviolet radiation, UVR) become increasingly intense. Given that  $10^{23}$  to  
52  $10^{24}$  microbes are estimated to disperse annually in the Earth-atmosphere system (13), new  
53 information is needed to determine the genetic basis and mechanisms enabling survival under the  
54 extreme conditions associated with atmospheric transport.

55           The stratosphere is the atmospheric layer above the troposphere (~15 to 50 km above sea  
56 level, ASL) and is characterized by low temperature, atmospheric pressure, and relative humidity  
57 (RH) and high UVR flux (9, 12–16). This combination of conditions is unique to any other  
58 location on Earth and similar to conditions on the surface of Mars (14, 15), making the  
59 stratosphere a relevant astrobiological analog to examine microbial survival potential on alien  
60 worlds (16–19). Microbes that survive conditions in the stratosphere are limited to those tolerant  
61 of water loss and exposure to high levels of UVR (20). The UVR spectrum consists of three  
62 types: UVAR (320-400 nm), UVBR (280-320 nm), and UVCR (100-280 nm). Oxygen and  
63 ozone in the lower stratosphere strongly absorb short wavelength UVR, and consequently,  
64 UVCR is not observed at lower altitudes in the troposphere (21). As such, the stratosphere is the

65 only natural laboratory on Earth to examine the biological effects of high energy UVR  
66 wavelengths.

67 UVR damages cells via direct and indirect effects. Direct absorption of UVR by DNA forms  
68 pyrimidine dimers that inhibit transcription and replication and can lead to single-stranded breaks  
69 in the sugar-phosphate backbone (22). Indirect effects of UVR occur through the generation of  
70 reactive oxygen species (ROS), which can induce single- and double- strand breaks, apurinic  
71 sites, and base damage in DNA, as well as the oxidation and chemical modification of proteins  
72 and lipids (23). Bacterial tolerance to UV is conferred by a complex network of genetic and  
73 physiological systems termed the “UV-resistome”, which has five basic functions: sense, shield,  
74 detoxify, repair, and tolerate (24). Photoreceptors and other stress sensors sense specific UV  
75 wavelengths and DNA damage, triggering a regulatory cascade that elicits specific cellular  
76 responses (25, 26). Specialized membrane proteins and UV-absorbing pigments shield  
77 intracellular components from irradiation (27). ROS-scavengers detoxify reactive species to  
78 prevent oxidative damage and maintain cellular redox homeostasis (28). Efficient DNA repair  
79 proteins repair genetic damages (29). And finally, error-prone polymerases tolerate and bypass  
80 unrepaired lesions to ensure survival of the cell at the cost of introducing mutations to the  
81 genome (30). The general response of bacteria to UVR and the DNA repair strategies utilized  
82 have been well-studied in organisms such as *E. coli* (22, 29, 31). However, model species are not  
83 representative of natural bacterial populations, and in particular, those that disseminate widely in  
84 the atmosphere.

85 Previously, we sampled aerosols to altitudes of 38 km ASL using a specialized payload  
86 attached to a helium balloon (32), isolated a variety of bacteria from the samples, and  
87 demonstrated their high tolerance to desiccation (15-25% RH) and UVCR ( $\lambda= 254$  nm) (20).

88 Several of the isolates displayed levels of resistance rivaling that of the highly radio- and xero-  
89 tolerant bacterium *Deinococcus radiodurans*. In this study, we sequenced the genomes of two  
90 highly tolerant isolates (*Curtobacterium* sp. L6-1 and *Noviherbaspirillum* sp. L7-7A) and used  
91 comparative genomic analyses with closely related, UV-sensitive reference strains to identify  
92 genetic features likely contributing to UVCR tolerance. We also used directed evolution of the  
93 UV-sensitive *Curtobacterium flaccumfaciens* pv. *flaccumfaciens* strain DSM 20129 (referred to  
94 hereafter as DSM 20129) to improve its UVCR tolerance and identified the mutations  
95 responsible for enhanced resistance. Additionally, we examined cellular ROS levels in the strains  
96 after UVCR exposure and assessed photolyase activities via an *in vivo* photorepair assay. Our  
97 results improve understanding of the mechanisms enabling bacterial survival during atmospheric  
98 transport and genetic determinants of UVR tolerance in taxa for which extreme resistance has not  
99 been previously reported or investigated.

## 100 **Results**

### 101 **UVCR-Resistance in Stratospheric Isolates and Related Strains**

102 Based on comparison of 16S rRNA gene sequences from strains L6-1 and L7-7A, these  
103 isolates were identified as members of the Gram-positive actinobacterial genus *Curtobacterium*  
104 and the Gram-negative betaproteobacterial genus *Noviherbaspirillum*, respectively (20). To  
105 assess whether the high UVCR tolerance observed in the isolates is a feature shared with other  
106 closely related taxa, actinobacterial and betaproteobacterial reference strains were identified (Fig.  
107 1A), obtained from culture collections (Table A1), and screened for UVCR tolerance. The  
108 inactivation rate ( $k$ ) and  $LD_{90}$  were derived from a survival curve for each strain (Table A2).  
109 *Curtobacterium* sp. L6-1 has higher UVCR tolerance ( $LD_{90}$  of  $470 \text{ J m}^{-2}$ ) than DSM 20129 ( $LD_{90}$   
110 of  $98 \text{ J m}^{-2}$ ; Fig. 1B; Table S2). Similarly, *Noviherbaspirillum* sp. L7-7A also displayed higher

111 UVCR tolerance than the reference strains tested (Fig. 1C), with an average LD<sub>90</sub> of 290 J m<sup>-2</sup>  
112 compared to 195 J m<sup>-2</sup> for *N. soli* SUEMI10, 63 J m<sup>-2</sup> for *N. autotrophicum* TSA66, and 35 J m<sup>-2</sup>  
113 for *N. denitrificans* TSA40 (Table A2).

#### 114 **Genetic Differences Between UVCR-Tolerant and -Sensitive Strains**

115 The disparities in UVCR tolerance between the stratospheric isolates and reference  
116 strains suggested that L6-1 and L7-7A possess genetically discernable features contributing to  
117 this phenotype. To enable comparative genomic analysis, whole genome sequences were  
118 obtained for the *Curtobacterium* and *Noviherbaspirillum* strains and deposited in GenBank (33).

119 Strain L6-1 has a single 3.4 Mbp circular chromosome with a GC content of 72.0% and  
120 3,158 genes encoding 12 rRNAs, 46 tRNAs, and 3,072 proteins (Table 1). Strain DSM 20129  
121 possesses a circular chromosome and plasmid that together total 3.8 Mbp, with a GC content of  
122 70.9%, and 3,616 genes encoding 9 rRNAs, 47 tRNAs, and 3,517 proteins. The two strains share  
123 83% average nucleotide identity (ANI), which is below >95% values typically observed for  
124 closely related populations in a species taxon (34–37). For the *Noviherbaspirillum* strains, L7-7A  
125 possesses three circular chromosomes consisting of 5.2 Mbp and a GC content of 62.0%, with  
126 4,771 genes encoding 15 rRNAs, 64 tRNAs, and 4,581 proteins. Although L7-7A has a genome  
127 size and content more similar to that of strain TSA66, it shares 79% ANI with both TSA66 and  
128 TSA40 and is likely a separate species (Table 1).

129 To analyze DNA repair and ROS detoxification pathways of the UV-resistome, genome  
130 comparisons using the RAST annotation server and the BLAST alignment tool were performed  
131 (Tables A3 and A4 for L6-1; Tables A5 and A6 for L7-7A; respectively). L6-1 encodes four  
132 additional proteins associated with DNA repair that are not found in DSM 20129 (Fig. 2; Table  
133 A3), including endonuclease VIII (*nei2*), two homologs of the UvrD/PcrA DNA helicases

134 (*uvrD2* & *pcrA*), and a cryptochrome/photolyase family protein (*phr1*). In addition to DNA  
135 repair genes, L6-1 encodes a homolog of the KatA catalase (*katA*; Fig. 2; Table A4), the major  
136 catalase expressed in vegetative *Bacillus* (38), whereas DSM 20129 encodes a KatX homolog  
137 (Table A4), which has been demonstrated to protect germinating endospores from H<sub>2</sub>O<sub>2</sub> stress  
138 (39). A homolog of the peroxide operon regulator PerR (*perR*) from *B. subtilis* is also found in  
139 L6-1, but not DSM 20129 (Fig. 2; Table A4). L6-1 also possesses an extra copy of the  
140 glutaredoxin-like protein NrdH (*nrdH2*; Fig. 2; Table A4) involved in disulfide reduction.

141         Of the nine DNA repair genes identified in L7-7A that are absent in strains TSA40 and  
142 TSA66 (Fig. 3; Table A5), there are additional copies of endonuclease III (*nth2* & *nth3*) and  
143 excinuclease UvrABC subunit A (*uvrA2*), along with the RecBCD nuclease subunit D (*recD*),  
144 DNA ligase C (*ligC*), alpha-ketoglutarate-dependent dioxygenase AlkB (*alkB*), error prone DNA  
145 polymerase V subunit D (*umuD*), and exonuclease SbcCD (*sbcC* & *sbcD*). Notably, all the  
146 *Noviherbaspirillum* strains lack the *recB* and *recC* genes, as well as genes for the alternative  
147 repair protein RecF of the RecFOR recombination pathway (Table A5). In addition to LigC,  
148 other essential components of the bacterial non-homologous end joining (NHEJ) repair pathway  
149 (LigD and Ku) are present in strains L7-7A and TSA40 (Table A5). Antioxidant genes unique to  
150 L7-7A (Fig. 3; Table A6) include additional copies of catalase (*katE*), a divalent metal cation  
151 transporter (*mntH2*), and the paraquat-inducible protein A (*pqiA2*). All three *Noviherbaspirillum*  
152 strains encode an ortholog of the *B. subtilis* KatX catalase (Table A6). However, L7-7A also  
153 encodes an ortholog of the *E. coli* KatE catalase (Fig. 3; Table A6). Though strain TSA40  
154 possesses two genes for MntH, *mntH2* has low similarity to the *mntH2* of L7-7A (Table A6) and  
155 may have a different function.

156 **Directed Evolution of UVCR Tolerance in *C. flaccumfaciens* DSM 20129**



157 Experiments designed to improve UVCR tolerance of the reference strains through  
158 repeated exposure to sublethal doses of UVCR (Fig. 4A) were partially successful. After 10  
159 rounds of selection, we were unable to significantly improve the UVCR tolerance of the  
160 *Noviherbaspirillum* strains (data not shown). However, decreased UVCR sensitivity occurred  
161 incrementally in strain DSM 20129 during 12 rounds of selection, increasing its LD<sub>90</sub> by 3.5-fold  
162 in comparison to the founder population and to a level comparable with isolate L6-1 (Fig. 4B).

163 Whole genome sequences were obtained for five evolved strains of DSM 20129 from the  
164 directed evolution experiment and where an increase in UVCR tolerance was observed (Table 2),  
165 and the mutations acquired were identified using the Breseq mutation analysis pipeline (40). In  
166 total, 40 mutations were identified in the most tolerant strain (DSM-9.3.3), with five occurring in  
167 intergenic regions, six in hypothetical genes, three in pseudogenes, and 26 in protein coding  
168 genes (Fig. 4C). Of the 26 mutations in protein coding genes, six are silent and 20 are  
169 nonsynonymous mutations (Table 2; Table A7) of proteins that participate in a wide range of  
170 reactions (Fig. 4C). The most notable are involved in DNA repair (uracil DNA glycosylase and  
171 DNA photolyase), cellular redox homeostasis (NAD(P)/FAD-dependent oxidoreductase in the  
172 thioredoxin reductase family), and the stress response (cold shock protein).

### 173 **Intracellular ROS Concentrations After UVCR Exposure**

174 Given the indirect effects of UVR exposure, we determined the concentration of ROS in  
175 the cells to assess if ROS detoxification may play a role in explaining the tolerances observed.  
176 ROS concentration before and after exposure to UVCR was monitored in isolate L6-1, the DSM  
177 20129 parent strain, and the most UVCR-tolerant evolved strain (DSM-9.3.3) using the free  
178 radical sensing fluorescent probe H<sub>2</sub>DCFDA. ROS concentration did not significantly increase in  
179 L6-1, DSM 20129, or DSM-9.3.3 at any of the UVCR doses tested (up to 1,980 J m<sup>-2</sup>; Fig. 5A).

180 Identical observations were made in experiments with *D. radiodurans* R1 (Fig. 5A), which is  
181 well known for its capacity to resist and detoxify oxidative stress-generating agents (41–43). In  
182 stark contrast, ROS concentrations in *E. coli* approximately doubled after each  $\sim 1,000 \text{ J m}^{-2}$  of  
183 UVCR exposure (Fig. 5A).

#### 184 ***In vivo* Assessment of Photolyase Activity**

185 The contribution of photolyase to UVCR tolerance was investigated using an *in vivo*  
186 photorepair assay. Light activates photolyase for the repair of DNA photoproducts (44);  
187 therefore, its relative activity can be determined by examining the survival rate of UVCR  
188 exposed populations that recover under white light in comparison to those kept in the dark.  
189 Consistent with previous studies (45–47), post-UVCR exposure to white light increased the  
190 survival rate for all strains (Fig. 5B). Based on the interpolated LD<sub>90</sub> values, there was not a  
191 significant difference in survival for DSM 20129 and DSM-9.3.3, indicating that the mutations  
192 incurred in the photolyase gene did not significantly affect DNA repair activity under the  
193 conditions tested (Fig. 5B inset). Photoreactivation of L6-1 increased the LD<sub>90</sub>  $\sim 140\%$ , which is  
194 significantly higher (P-value = 0.004; one-way ANOVA) than the  $\sim 19\%$  increase observed for  
195 the DSM strains (Fig. 5B inset).

196 To determine if the second photolyase gene possessed by strain L6-1 contributes to its  
197 superior photorepair capacity, we aligned the sequences to known CPD and (6-4) photolyases.  
198 The CPD photolyases from *E. coli* (EcPhrB) and *Agrobacterium fabrum* (AfPhrA) align well  
199 with one of the photolyases found in L6-1 (*phr2*: KM842\_RS02105) and the photolyase from  
200 DSM 20129 (*phr*: K0028\_16065) (Fig. A1A). However, the additional photolyase in L6-1 (*phr1*:  
201 KM842\_RS01465) is more closely related ( $\sim 37\%$  identity) to the bacterial (6-4) photolyases of  
202 *A. fabrum* (AfPhrB), *Cereibacter sphaeroides* (CsCryB), and *Vibrio cholerae* (Vc(6–4) FeS-

203 BCP), and the active site residues determined for AfPhrB are largely conserved in all four  
204 species (Fig. A1B). Furthermore, the protein structural prediction algorithm AlphaFold2 was  
205 used to model 3D structures for the L6-1 and DSM 20129 photolyases with a high degree of  
206 confidence (Fig. A2A-C). 3D structural alignments with the *E. coli* CPD photolyase (EcPhrB,  
207 PDB ID: 1DNP) show high similarity with the L6-1 Phr2 and DSM 20129 Phr, with a template-  
208 modeling score (TM-score) of 0.87 for both proteins (Fig. A3A). The L6-1 Phr1 shows high  
209 similarity with the *A. fabrum* (6-4) photolyase (AfPhrB, PDB ID: 5KCM) with a TM-score of  
210 0.89, further supporting its proposed function as a bacterial (6-4) photolyase (Fig. A3B).

211 To assess the contributions of *phr1* and *phr2* to survival under UVCR exposure, we  
212 cloned them into expression vectors for heterologous expression in *E. coli* BL21 cells. Wild type  
213 BL21 cells were rapidly inactivated upon UVCR exposure, with an LD<sub>90</sub> of 16 J m<sup>-2</sup> under  
214 photoreactivating conditions (Fig. A4A). Overexpression of the native *E. coli* CPD photolyase  
215 (EcPhrB) significantly increased the LD<sub>90</sub> by more than 230% during photoreactivation (Fig.  
216 A4B). Photoreactivation by the putative CPD photolyases from the *Curtobacterium* strains  
217 (L6Phr2 and DSMPPhr for L6-1 *phr2* and DSM 20129 *phr*, respectively) also improved the  
218 survival of BL21, increasing the LD<sub>90</sub> by 330% and 270%, respectively (Fig. A4B). In contrast,  
219 expression of the putative (6-4) photolyase from strain L6-1 (L6Phr1) alone did not significantly  
220 improve UVCR survival of BL21 cells (Fig. A4B). However, when the two L6-1 photolyases  
221 were co-expressed (L6Phr1 + L6Phr2), photoreactivation significantly improved survival over  
222 L6Phr2 alone (Fig. A4B) and increased the LD<sub>90</sub> by an average of 400%.

## 223 Discussion

224 There is a strong gradient of increasing biological stressors with altitude in the  
225 atmosphere (48, 49), and under the extreme environmental conditions in the stratosphere,

226 prolonged exposure to UVR and desiccation are most important to limiting survival (18, 19, 50–  
227 61). The bacterial isolates studied (*Curtobacterium* sp. L6-1 and *Noviherbaspirillum* sp. L7-7A)  
228 were isolated from aerosols sampled at altitudes of 18 to 29 km ASL in New Mexico, USA and  
229 investigated because of their high tolerance to UVCR and desiccation (20). We tested close  
230 phylogenetic relatives of these isolates and found that they do not have extraordinary tolerance to  
231 UVCR (Fig. 1), providing an opportunity for a comparative analysis. UVR-induced cellular  
232 damage occurs directly through dimerization of pyrimidine bases in DNA, and indirectly,  
233 through the ROS generated by photosensitization mechanisms (31, 62). Accordingly, we  
234 hypothesized that higher tolerance to UVCR by isolates from the stratosphere is due to  
235 possessing DNA repair and antioxidant genes not found in their sensitive relatives.

#### 236 *Comparative genomic evidence for UVR tolerance in Noviherbaspirillum* sp. L7-7A

237 To our knowledge, UVR tolerance in the genus *Noviherbaspirillum* has not been  
238 previously reported or examined. Though we were unable to improve UVCR tolerance in the  
239 *Noviherbaspirillum* reference strains through directed evolution, comparative genomic analyses  
240 identified 12 genes in isolate L7-7A involved in DNA repair and antioxidant systems that were  
241 not present in the *Noviherbaspirillum* reference strain genomes (Fig. 3; Tables A5-A6): *nth2*,  
242 *nth3*, *uvrA2*, *recD*, *ligC*, *alkB*, *umuD*, *sbcC*, *sbcD*, *katE*, *mntH2*, and *pqiA2*. Previous studies  
243 have implicated a role for these genes in UVCR tolerance (Supplemental Discussion), and as  
244 such, any one (or combination) of these 12 genes could be responsible for isolate L7-7A's high  
245 UVCR tolerance. However, genes with unknown functions (~21% of ORFs in the L7-7A  
246 genome) cannot be ruled out as contributing to this phenotype.

#### 247 *Genetic basis of UVR tolerance in the Curtobacterium* strains

248 Previous studies have documented high UVR tolerance in members of the  
249 *Curtobacterium*, implying that it may be a common phenotype in this genus. Sundin and Jacobs  
250 (63) examined UVCR tolerance in bacteria isolated from the phyllosphere of field-grown peanut  
251 plants and found that *Curtobacterium* strains represented the largest proportion (~43%, n=213)  
252 of those with UVCR minimum inhibitory doses (MID<sub>c</sub>) greater than 150 J m<sup>-2</sup>. Highly UVCR  
253 resistant strains of *Curtobacterium* have also been isolated from desert rock varnish, with 17%  
254 remaining viable after a UVCR dose of 220 J m<sup>-2</sup> (64). Our results are consistent with these  
255 studies, with even the most UVCR “sensitive” *Curtobacterium* strain (DSM 20129) having an  
256 LD<sub>90</sub> of ~100 J m<sup>-2</sup>. Notably, *Curtobacterium* sp. L6-1 has a UVCR LD<sub>90</sub> of 470 J m<sup>-2</sup>, which is  
257 more than double of that reported for other members of this genus and near survival rates  
258 reported for *D. radiodurans* (660 J m<sup>-2</sup>; (65)). In general, a species’ tolerance to UVR  
259 approximates natural exposure (24), which makes high tolerance to UVCR a surprising  
260 phenotype for populations to maintain in surface environments. However, this phenotype would  
261 be highly relevant for enabling survival and persistence at high altitudes in the atmosphere (20).

262 Comparative genomic analyses with DSM 20129 showed that strain L6-1 possesses  
263 seven additional genes related to DNA repair and antioxidant systems (Fig. 2; Tables A3-A4):  
264 *nei2*, *uvrD2*, *pcrA*, *phr1*, *katA*, *perR*, and *nrdH2*. Endonuclease VIII (*nei2*) is a bifunctional DNA  
265 N-glycosylase and abasic (AP) site lyase involved in the BER pathway. It initiates DNA repair  
266 by recognizing and removing oxidative base lesions and cleaving the phosphodiester backbone  
267 of the resulting AP site (66, 67). The UvrD DNA helicase II protein unwinds DNA in the 3'-5'  
268 direction and plays a critical role in recombination, NER, and MMR (68–70). PcrA is a homolog  
269 of the UvrD helicase found in Gram-positive bacteria and has also been shown to participate in  
270 repairing UVR-induced DNA damage in *Bacillus* species (71).

271           Glutaredoxins (Grx) and glutathione (GSH), the main nonenzymatic antioxidants in  
272 Gram-negative bacteria, are generally absent in Gram-positive species. Many actinobacterial  
273 species are known to possess an alternative antioxidant system involving mycothiol (MSH), a  
274 low molecular weight thiol (72). Both L6-1 and DSM 20129 possess homologs for the *mshA-D*  
275 operon of the MSH biosynthesis pathway, and thus, MSH may serve as an important antioxidant  
276 in these strains. An additional copy of the gene encoding glutaredoxin-like protein NrdH in strain  
277 L6-1 is notable as NrdH has been shown to perform similar functions as the Grx/GSH system  
278 and is reducible by thioredoxin reductase (73, 74), an enzyme ubiquitous in all domains of life.  
279 In the GSH-lacking bacterium *Corynebacterium glutamicum*, NrdH enhances oxidative stress  
280 resistance (75), suggesting the second *nrdH* gene in L6-1 could play a similar role.

#### 281 *Cross-tolerance to environmental stress*

282           Desiccation- and radio-tolerance phenotypes frequently co-occur in extremophilic  
283 bacteria and archaea (76–84). Given that the acute doses to which radiotolerant species are  
284 resistant greatly exceed natural ionizing radiation sources on Earth, there is no evolutionary basis  
285 for ionizing radiation resistance to arise through natural selection. Studies have demonstrated a  
286 genetic linkage between desiccation- and ionizing radiation-resistance in *D. radiodurans* R1,  
287 supporting the hypothesis that DNA repair mechanisms evolved to compensate for water loss are  
288 also highly effective at repairing the similar pattern of DNA damage produced by exposure to  
289 ionizing radiation (85). Similarly, there is no obvious fitness benefit to having high UVCR  
290 resistance in any modern environment on Earth besides the stratosphere. However, since water  
291 stress is a very common phenomenon in the biosphere, the genetic and biochemical mechanisms  
292 that enhance survival to desiccation (e.g., ROS detoxification) may also provide tolerance to  
293 UVCR. Further, when L6-1 and L7-7A are desiccated (25% RH) and exposed to UVCR, their

294 LD<sub>90</sub>s are 1200 J m<sup>-2</sup> and 580 J m<sup>-2</sup>, respectively (20). These rates of survival are 2- to 3-fold  
295 higher than those observed when water has not been actively removed from the cells (Table A2)  
296 and highlights another protective effect that desiccation resistance can provide against indirect  
297 effects of UVR exposure.

298         In addition to possessing efficient pathways for repairing DNA damage, the ionizing and  
299 UVCR ‘resistome’ also includes mechanisms to physiologically detoxify ROS generated during  
300 exposure to these high-energy wavelengths. ROS produced when cells are exposed to UVR or  
301 desiccated can oxidize lipids and proteins (86, 87), as well as react with many other cellular  
302 constituents to inflict damage. ROS detoxification is known to have a role in bacterial  
303 desiccation resistance (87) and radiosensitive strains of *D. radiodurans* are more susceptible to  
304 oxidative damage than radiotolerant strains (88). Oxidative stress is a major contributor to the  
305 damage caused by desiccation and radiation; therefore, efficient antioxidant systems are likely to  
306 be important traits of xero- and radio-tolerant species. Our experiments indicate the presence of  
307 efficient ROS detoxification mechanisms in L6-1 and DSM 20129, with neither showing any  
308 significant increases in intracellular ROS concentrations after UVCR exposure (Fig. 5A). This  
309 implies other members of the *Curtobacterium* could also possess this trait, a contention  
310 supported by a study that exposed phyllosphere communities to the highly oxidative compound  
311 ozone (5,000-10,000 ppb) and found that the relative abundance of *Curtobacterium* taxa  
312 increased by ~4-fold, implying a high tolerance of ozone (89). Consequently, it is tempting to  
313 speculate on the role that microbial antioxidant mechanisms may play during stratospheric  
314 transport beyond enhancing microbial tolerance to UVR and desiccation, as the concentration of  
315 ozone at altitudes of 15 to 30 km ASL (~1,000 to 8,000 ppb) is ~1000-fold higher than air near  
316 the surface (90).

317 *Photoprotection strategies in Curtobacterium*

318           The comparative genomics analysis and directed evolution experiments implicated  
319 photolyase family proteins in providing increased UVCR tolerance in the *Curtobacterium* strains  
320 (Figs. 2 and 4C; Table 2). In bacteria, UVR-induced DNA dimers are repaired through direct  
321 reversal by photolyases or the lesion is removed via the NER pathway. NER requires the  
322 coordinated action of multiple proteins for incision, unwinding, and excision of a damage-  
323 containing segment of DNA, followed by resynthesis and ligation of the excised nucleotides (22,  
324 29, 91). However, because this is an energy-intensive process, a more measured response may be  
325 necessary if a generous supply of energy is not available to the cell. For instance, direct reversal  
326 of DNA photoproducts by photolyases requires a single protein and light. Given the opportunity  
327 to function, the selective advantages of the photolyase repair system would make it a trait  
328 favorable to any species in an energy limited, high UVR flux environment, including the high  
329 atmosphere.

330           Photolyases catalyze the direct reversal of pyrimidine dimers in DNA when activated  
331 with near-UV/blue light in a process called photoreactivation (44). Two major classes of DNA  
332 photoproducts are produced by UVR: cyclobutane pyrimidine dimers (CPD) and pyrimidine (6-  
333 4) pyrimidone photoproducts (6-4PP). Direct repair of these lesions is catalyzed by photolyases  
334 specific to each lesion type (44, 92). Though CPD photolyases are widespread amongst bacteria,  
335 only three bacterial (6-4) photolyases have been characterized to date: PhrB of *Agrobacterium*  
336 *fabrum* (45, 93) (formerly *Agrobacterium tumefaciens* (94)), CryB of *Cereibacter sphaeroides*  
337 (95, 96) (formerly *Rhodobacter sphaeroides* (97)), and Vc(6-4) FeS-BCP of *Vibrio cholerae*  
338 (98). However, phylogenetic comparison with photolyase genes in the eukaryotic  
339 cryptochrome/photolyase family suggests that (6-4) photolyases are more prevalent in



340 prokaryotes than initially thought (93). Sequence alignments and predicted structural models of  
341 the L6-1 photolyases (Fig. A1) suggest it possesses a putative CPD photolyase (*phr2*:  
342 KM842\_RS16065) and (6-4) photolyase (*phr1*: KM842\_RS01465). Strain L6-1 has higher  
343 photorepair capacity than strain DSM 20129 (Fig. 5B), which only possesses a CPD photolyase.

344 To demonstrate functionality of the putative 6-4PP and CPD photolyases of L6-1, *phr1*  
345 and *phr2*, respectively, were heterologously expressed in *E. coli* and their effects on its UVCR  
346 tolerance were examined. Although expression of *phr1* did not increase UVCR tolerance over  
347 that observed in the control, expression of *phr2* increased survival by ~325%, while co-  
348 expression of *phr1* and *phr2* increased the survival rate even further (Fig. A4). These results are  
349 likely due to the larger number of CPD lesions (75-90% of total) upon UV exposure as compared  
350 to 6-4PP generated (22, 99–101). If further study shows the L6-1 *phr1* to be a bona fide (6-4)  
351 photolyase, its activity alone might be expected to have a negligible effect on cell survival since  
352 the overwhelming amount of DNA damage would be CPD dimers. However, when *phr1* and  
353 *phr2* are co-expressed, the repair of both CPD and 6-4PP dimers has a synergistic effect on  
354 survival.

### 355 *Conclusion*

356 We investigated the genetic basis for extreme UVCR resistance phenotypes in bacteria  
357 recovered from stratospheric air masses (20), where high UVCR fluxes and low water  
358 availability represent endmember values for these variables in the biosphere. Recognizing the  
359 genetic underpinnings for the expressed characteristics mitigating damage from UVCR was  
360 facilitated by the rich history of experimental work that has characterized the biochemistry and  
361 molecular biology of DNA repair processes in model organisms. In fact, the genomes of the  
362 proteobacterial and actinobacterial strains studied encode genes for most, if not all, of the typical

363 complement of DNA repair proteins documented in *E. coli* and many other bacteria. This  
364 indicates that strains L7-7A and L6-1 operate their canonical DNA repair pathways in a manner  
365 more effective than other species and/or that survival to UVCR is enhanced through alternative  
366 mechanisms. For microbial species surviving long distance dispersal as aerosols in the  
367 atmosphere, efficient DNA repair systems, such as photoreactivation, and mechanisms that  
368 evolved to cope with water stress are likely to be valuable for enduring the high UVR fluxes that  
369 intensify with altitude.

## 370 **Materials and Methods**

### 371 ***Bacterial Strains and Culture Conditions***

372 The bacterial strains used in this study are listed in Table A1. *Curtobacterium* sp. L6-1 and  
373 *Noviherbaspirillum* sp. L7-7A were isolated from aerosols collected using a helium balloon  
374 payload that sampled at altitudes of 18 to 23 km and 24 to 29 km ASL, respectively, near Ft.  
375 Sumner, New Mexico in 2013 (32). Reference strains phylogenetically related to isolates L6-1  
376 and L7-7A and that were identified as available in culture collections were obtained from the  
377 German Collection of Microorganisms and Cell Cultures (DSMZ) and the United States  
378 Department of Agriculture (USDA) Agricultural Research Service Culture Collection (NRRL).  
379 These included *Curtobacterium flaccumfaciens* pv. *flaccumfaciens* (DSM 20129), *Mycetocola*  
380 *reblochoni* (LMG 22367), *Plantibacter flavus* (DSM 14012T), and *Noviherbaspirillum soli*  
381 (SUEMI10). *Noviherbaspirillum denitrificans* (TSA40) and *Noviherbasprillum autotrophicum*  
382 (TSA66) were kindly provided by Dr. Satoshi Ishii of the University of Minnesota. Unless  
383 otherwise noted, the actinobacterial and betaproteobacterial strains were cultured aerobically at  
384 30°C with vigorous shaking in LB (10 g L<sup>-1</sup> tryptone, 5 g L<sup>-1</sup> yeast extract, 10 g L<sup>-1</sup> NaCl) and  
385 R2A (Difco cat. no.: 218262) media, respectively. When required, media were amended with

386 antibiotics at the following concentrations: spectinomycin ( $50 \mu\text{g mL}^{-1}$ ) & carbenicillin ( $100 \mu\text{g}$   
387  $\text{mL}^{-1}$ ).

### 388 *UVCR Survival Assays*

389 Cultures were grown in 5 mL of liquid media to stationary phase, and six serial dilutions of this  
390 material were prepared in 10 mM  $\text{MgSO}_4$ . Ten  $\mu\text{L}$  of each dilution was transferred to six sections  
391 of a square plate containing agar-solidified growth media. Portions of the plate were then  
392 covered with aluminum foil such that sections uncovered sequentially during 1 min interval  
393 exposures were provided with controlled doses of UVCR (GE G36T5 UVC Light Bulb;  $\lambda = 254$   
394 nm;  $3.3 \text{ W m}^{-2}$ ) that were 198, 396, 594, 792, and 990  $\text{J m}^{-2}$ . The UVCR dose was measured  
395 using a digital radiometer (Solar Light Company, Inc., Glenside, PA). The longest exposure for  
396 the populations was 5 min. and the section of the plate that remained covered during the  
397 experiment (i.e., was not exposed to UVCR) served as the control ( $N_0$ ). The cultures were  
398 incubated at  $30^\circ\text{C}$  for 24 to 48 h and the number of colony forming units (CFU) surviving each  
399 UVCR dose (N) was used to calculate the surviving fraction, expressed as  $N/N_0$ . Survival rates  
400 are reported as the mean and SEM for three biological replicates.

### 401 *Whole Genome Sequencing and Comparative Genomics*

402 Whole genome sequences for *Noviherbaspirillum sp.* L7-7A, *Curtobacterium sp.* L6-1, and  
403 *Curtobacterium flaccumfaciens* strain DSM 20129 were obtained as described previously (33).  
404 Briefly, stationary phase cultures were pelleted, frozen ( $-70^\circ\text{C}$ ), and shipped to SNPsaurus  
405 (Eugene, OR) for DNA extraction, library preparation, sequencing, and genome assembly using  
406 the PacBio Sequel II sequencing platform followed by de novo genome assembly using the Flye  
407 v2.7 assembler (102). The assembled genomes were submitted to GenBank (L7-7A: [JAHQRJ01](#);

408 L6-1: [CP076544.1](#); DSM 20129: [CP080395.1/CP080396.1](#)) and annotated using the NCBI  
409 Prokaryotic Genome Annotation Pipeline (PGAP) (103).  
410 Average nucleotide identity (ANI) and average amino acid identity (AAI) among the isolates and  
411 reference strains were calculated using the ANI and AAI calculators from the Kostas lab  
412 (<http://enve-omics.ce.gatech.edu/>) (104, 105). Functional comparisons were made with the Rapid  
413 Annotation using Subsystem Technology (RAST) server and the SEED Viewer (106–108).  
414 Further comparisons were made by searching for homologs of known DNA repair and ROS  
415 detoxification proteins from model organisms in the L6-1, DSM 20129, L7-7A, TSA40, and  
416 TSA66 genomes using the blastp algorithm from NCBI’s Basic Local Alignment Search Tool  
417 (BLAST) (109). Query protein sequences were obtained from the UniProt database for  
418 *Escherichia coli* strain K12, *Bacillus subtilis* strain 168, and *Mycobacterium tuberculosis* strain  
419 ATCC 25618 / H37Rv (110). Reciprocal best hits were considered homologs if the bit score was  
420 >50, E-value was <1e-5, and query coverage was >50% (111). Differences in gene content  
421 among the isolates and the reference strain relatives were visualized using the BLAST Ring  
422 Image Generator (BRIG) (112).

### 423 ***Directed Evolution and Mutation Analysis***

424 The survival of strain DSM 20129 to UVCR exposure was determined as described above.  
425 Triplicate colonies surviving the highest UVCR dose were selected, grown separately in liquid  
426 media, exposed to UVCR (as described in the section “UVCR Survival Assays” above), and the  
427 process was repeated a total of 12 times (Fig. 4A). The populations from each cycle of exposure  
428 were archived by freezing aliquots of the cultures in 25% glycerol and storing at -70°C.  
429 Genome sequences were obtained for select strains throughout the directed evolution process  
430 using the Illumina NextSeq 2000 sequencing platform (Microbial Genome Sequencing Center,

431 Pittsburgh, PA) with 2×150 bp reads. Sequencing reads were quality filtered and adaptors  
432 trimmed using the Trim Galore script (113), followed by mapping to the reference genome and  
433 mutation identification with the Breseq mutation analysis pipeline (40). The ancestral parent  
434 strain was sequenced and used as a control to correct the reference genome before comparison  
435 with the evolved strains. Gene Ontology (GO) functional annotations for proteins incurring  
436 mutations throughout the directed evolution process were obtained using Blast2GO (114).

### 437 ***ROS Quantification Assays***

438 The free radical probe 2',7'-dichlorodihydrofluoresceindiacetate (H<sub>2</sub>DCFDA) (Biotium,  
439 Fremont, CA) was used to quantify ROS. Stationary phase cultures of *E. coli* MG1655, *D.*  
440 *radiodurans* R1, isolate L6-1, the wild-type parent strain DSM 20129, and UV-evolved strain  
441 DSM-9.3.3 were diluted to OD<sub>600</sub> 1.0 in 10 mL of media. Cells were washed with 10 mM  
442 potassium phosphate buffer (pH 7.0) and incubated for 30 min at 25°C in the same buffer  
443 containing 10 μM H<sub>2</sub>DCFDA. Subsequently, cells were washed and resuspended in 10 mL  
444 potassium phosphate buffer (10 mM; pH 7.0), transferred to 60×15 mm petri plates, and exposed  
445 to UVCR doses of 0, 990, or 1,980 J m<sup>-2</sup> while stirring the cell suspensions at 400 rpm with a  
446 magnetic stir bar. The exposed cell populations were then washed, resuspended in fresh buffer,  
447 and disrupted by vortexing with lysing matrix B (MP Biomedicals). Cellular debris was removed  
448 by centrifugation for 10 min at 5,000×g, and fluorescence intensity in the supernatant was  
449 measured using a multi-well plate reader (Molecular Devices SpectraMax M3; Exc. 490nm,  
450 Emm. 519nm). The amount of fluorescence observed was normalized per mg of protein, as  
451 determined by the Pierce BCA Protein Assay Kit (Thermo Scientific) and compared relative to  
452 data from the unexposed control (i.e., time zero is 100% fluorescence intensity). Values reported  
453 are the average of three biological replicates and the error bars indicate SEM.

#### 454 ***Photolyase Activity Assays and Sequence/Structural Comparisons***

455 To assess *in vivo* photorepair, isolate L6-1, the DSM 20129 founder strain, and UV-evolved  
456 strain DSM-9.3.3 were grown to stationary phase and exposed to UVCR using the same method  
457 as described for the UVCR survival assays. After exposure, half of the cultures were  
458 immediately placed in the dark and the other half were photoreactivated for 1 h under a daylight  
459 lamp (GE F20T12-C50-ECO 20W Chroma 50 5000K Ecolux Daylight Light Bulb). All of the  
460 cultures were subsequently incubated in the dark at 30°C until colonies formed. Survival rates  
461 under dark and light conditions were calculated, and the lethal dose reducing the population by  
462 90% (LD<sub>90</sub>) was determined by fitting the survival curves to an exponential decay model. The  
463 percent increase in LD<sub>90</sub> by photoreactivation was calculated using the equation:

$$464 \frac{LD90_{Light} - LD90_{Dark}}{LD90_{Dark}} \times 100 = \% \text{ Increase. Results shown represent the average of four biological}$$

465 replicates with error bars representing SEM.

#### 466 **Acknowledgements**

467 This work was supported by funding from the University of Florida Institute of Food and  
468 Agricultural Sciences and awards from the National Aeronautics and Space Administration  
469 (NASA) Exobiology Program (80NSSC21K0486) and the University of Central Florida NASA  
470 Florida Space Grant Consortium and Space Florida (NNX15034). B.C.C. is indebted to John R.  
471 Battista for enduring countless discussions on bacterial radio- and desiccation-tolerance. Satoshi  
472 Ishii of the University of Minnesota kindly provided strains for the analysis. We thank Madison  
473 Drum for assistance with the directed evolution experiments. We also thank T. Gregory Guzik,  
474 Noelle Bryan, Doug Granger, Michael Stewart, and the many other dedicated members of the  
475 2009-2013 ACES and HASP balloon programs at Louisiana State University for their tireless  
476 efforts in developing/testing the aerosol sampling payloads, conducting the missions (and their

477 recovery, no matter where it landed!), and performing the initial research that made this study  
478 possible.

479 **References**

- 480 1. Douwes J, Thorne P, Pearce N, Heederik D. 2003. Bioaerosol health effects and exposure  
481 assessment: progress and prospects. *Ann Occup Hyg* 47:187–200.
- 482 2. Kim KH, Kabir E, Jahan SA. 2018. Airborne bioaerosols and their impact on human  
483 health. *J Environ Sci (China)* 67:23.
- 484 3. Dillon CF, Dillon MB. 2020. Multiscale Airborne Infectious Disease Transmission. *Appl*  
485 *Environ Microbiol* 87:e02314–e02320.
- 486 4. Yadav S, Gettu N, Swain B, Kumari K, Ojha N, Gunthe SS. 2020. Bioaerosol impact on  
487 crop health over India due to emerging fungal diseases (EFDs): an important missing link.  
488 *Environ Sci Pollut Res Int* 27:12802–12829.
- 489 5. Brown JKM, Hovmøll MS. 2002. Aerial dispersal of pathogens on the global and  
490 continental scales and its impact on plant disease. *Science* 297:537–541.
- 491 6. Phillips VTJ, Andronache C, Christner B, Morris CE, Sands DC, Bansemer A, Lauer A,  
492 McNaughton C, Seman C. 2009. Potential impacts from biological aerosols on ensembles  
493 of continental clouds simulated numerically. *Biogeosciences* 6:987–1014.
- 494 7. Joyce RE, Lavender H, Farrar J, Werth JT, Weber CF, D’Andrilli J, Vaitilingom M,  
495 Christner BC. 2019. Biological Ice-Nucleating Particles Deposited Year-Round in  
496 Subtropical Precipitation. *Appl Environ Microbiol* 85:1567–1586.
- 497 8. Fröhlich-Nowoisky J, Kampf CJ, Weber B, Huffman JA, Pöhlker C, Andreae MO, Lang-  
498 Yona N, Burrows SM, Gunthe SS, Elbert W, Su H, Hoor P, Thines E, Hoffmann T,  
499 Després VR, Pöschl U. 2016. Bioaerosols in the Earth system: Climate, health, and  
500 ecosystem interactions. *Atmos Res* 182:346–376.
- 501 9. Smith DJ, Griffin DW, McPeters RD, Ward PD, Schuerger AC. 2011. Microbial survival  
502 in the stratosphere and implications for global dispersal. *Aerobiologia (Bologna)* 27:319–  
503 332.
- 504 10. Smith DJ. 2013. Microbes in the upper atmosphere and unique opportunities for  
505 astrobiology research. *Astrobiology* 13:981–990.
- 506 11. Maki T, Hara K, Kobayashi F, Kurosaki Y, Kakikawa M, Matsuki A, Chen B, Shi G,  
507 Hasegawa H, Iwasaka Y. 2015. Vertical distribution of airborne bacterial communities in  
508 an Asian-dust downwind area, Noto Peninsula. *Atmos Environ* 119:282–293.
- 509 12. Els N, Baumann-Stanzer K, Larose C, Vogel TM, Sattler B. 2019. Beyond the planetary  
510 boundary layer: Bacterial and fungal vertical biogeography at Mount Sonnblick, Austria.  
511 *Geo* 6:e00069.

- 512 13. Burrows SM, Butler T, Jöckel P, Tost H, Kerkweg A, Pöschl U, Lawrence MG. 2009.  
513 Bacteria in the global atmosphere - Part 2: Modeling of emissions and transport between  
514 different ecosystems. *Atmos Chem Phys* 9:9281–9297.
- 515 14. Rodriguez-Manfredi JA, de la Torre Juarez M, Sanchez-Lavega A, Hueso R, Martinez G,  
516 Lemmon MT, Newman CE, Munguira A, Hieta M, Tamppari LK, Polkko J, Toledo D,  
517 Sebastian E, Smith MD, Jaakonaho I, Genzer M, De Vicente-Retortillo A, Viudez-  
518 Moreiras D, Ramos M, Saiz-Lopez A, Lepinette A, Wolff M, Sullivan RJ, Gomez-Elvira  
519 J, Apestigue V, Conrad PG, Del Rio-Gaztelurrutia T, Murdoch N, Arruego I, Banfield D,  
520 Boland J, Brown AJ, Ceballos J, Dominguez-Pumar M, Espejo S, Fairén AG, Ferrandiz R,  
521 Fischer E, Garcia-Villadangos M, Gimenez S, Gomez-Gomez F, Guzewich SD, Harri  
522 AM, Jimenez JJ, Jimenez V, Makinen T, Marin M, Martin C, Martin-Soler J, Molina A,  
523 Mora-Sotomayor L, Navarro S, Peinado V, Perez-Grande I, Pla-Garcia J, Postigo M,  
524 Prieto-Ballesteros O, Rafkin SCR, Richardson MI, Romeral J, Romero C, Savijärvi H,  
525 Schofield JT, Torres J, Urqui R, Zurita S. 2023. The diverse meteorology of Jezero crater  
526 over the first 250 sols of Perseverance on Mars. *Nat Geosci* 16:19–28.
- 527 15. Polkko J, Hieta M, Harri A-M, Tamppari L, Martínez G, Viúdez-Moreiras D, Savijärvi H,  
528 Conrad P, Mier MPZ, Juarez MDLT, Hueso R, Munguira A, Leino J, Gómez F,  
529 Jaakonaho I, Fischer E, Genzer M, Apestigue V, Arruego I, Banfield D, Lepinette A,  
530 Paton M, Rodriguez-Manfredi JA, Lavega AS, Sebastian E, Toledo D, Vicente-Retortillo  
531 A. 2023. Initial Results of the Relative Humidity Observations by MEDA Instrument  
532 Onboard the Mars 2020 Perseverance Rover. *J Geophys Res Planets* 128:e2022JE007447.
- 533 16. Smith DJ, Thakrar PJ, Bharrat AE, Dokos AG, Kinney TL, James LM, Lane MA,  
534 Khodadad CL, Maguire F, Maloney PR, Dawkins NL. 2014. A Balloon-Based Payload for  
535 Exposing Microorganisms in the Stratosphere (E-MIST). *Gravitational and Space*  
536 *Research* 2:70–80.
- 537 17. Smith DJ, Sowa MB. 2017. Ballooning for Biologists: Mission Essentials for Flying Life  
538 Science Experiments to Near Space on NASA Large Scientific Balloons. *Gravit Space*  
539 *Res* 5:52.
- 540 18. Pulschen AA, de Araujo GG, de Carvalho ACSR, Cerini MF, de Mendonça Fonseca L,  
541 Galante D, Rodrigues F. 2018. Survival of Extremophilic Yeasts in the Stratospheric  
542 Environment during Balloon Flights and in Laboratory Simulations. *Appl Environ*  
543 *Microbiol* 84.
- 544 19. Cortesão M, Siems K, Koch S, Beblo-Vranesevic K, Rabbow E, Berger T, Lane M, James  
545 L, Johnson P, Waters SM, Verma SD, Smith DJ, Moeller R. 2021. MARSBOx: Fungal  
546 and Bacterial Endurance from a Balloon-Flown Analog Mission in the Stratosphere. *Front*  
547 *Microbiol* 12:601713.
- 548 20. Bryan NC, Christner BC, Guzik TG, Granger DJ, Stewart MF. 2019. Abundance and  
549 survival of microbial aerosols in the troposphere and stratosphere. *ISME Journal* 13:2789–  
550 2799.



- 551 21. Kerr JB, Fioletov VE. 2008. Surface ultraviolet radiation. *Atmosphere-Ocean* 46:159–184.
- 552 22. P. Sinha R, Donat-P. Häder. 2002. UV-induced DNA damage and repair: a review.  
553 *Photochemical & Photobiological Sciences* 1:225–236.
- 554 23. Pattison DI, Davies MJ. 2006. Actions of ultraviolet light on cellular structures. *EXS*  
555 (96):131–157.
- 556 24. Kurth D, Belfiore C, Gorriti MF, Cortez N, Farias ME, Albarracín VH. 2015. Genomic  
557 and proteomic evidences unravel the UV-resistome of the poly-extremophile  
558 *Acinetobacter* sp. Ver3. *Front Microbiol* 6.
- 559 25. Takano H, Obitsu S, Beppu T, Ueda K. 2005. Light-Induced Carotenogenesis in  
560 *Streptomyces coelicolor* A3(2): Identification of an Extracytoplasmic Function Sigma  
561 Factor That Directs Photodependent Transcription of the Carotenoid Biosynthesis Gene  
562 Cluster. *J Bacteriol* 187:1825.
- 563 26. Ávila-Pérez M, Hellingwerf KJ, Kort R. 2006. Blue Light Activates the  $\sigma$ B-Dependent  
564 Stress Response of *Bacillus subtilis* via YtvA. *J Bacteriol* 188:6411.
- 565 27. Gao Q, Garcia-Pichel F. 2011. Microbial ultraviolet sunscreens. *Nat Rev Microbiol*  
566 9:791–802.
- 567 28. Lemire J, Alhasawi A, Appanna VP, Tharmalingam S, Appanna VD. 2017. Metabolic  
568 defence against oxidative stress: the road less travelled so far. *J Appl Microbiol* 123:798–  
569 809.
- 570 29. Goosen N, Moolenaar GF. 2008. Repair of UV damage in bacteria. *DNA Repair (Amst)*  
571 7:353–379.
- 572 30. Tang M, Shen X, Frank EG, O'Donnell M, Woodgate R, Goodman MF. 1999. UmuD'2C  
573 is an error-prone DNA polymerase, *Escherichia coli* pol V. *Proc Natl Acad Sci U S A*  
574 96:8919–8924.
- 575 31. Rastogi RP, Richa, Kumar A, Tyagi MB, Sinha RP. 2010. Molecular Mechanisms of  
576 Ultraviolet Radiation-Induced DNA Damage and Repair. *J Nucleic Acids* 2010:32.
- 577 32. Bryan NC, Stewart M, Granger D, Guzik TG, Christner BC. 2014. A method for sampling  
578 microbial aerosols using high altitude balloons. *J Microbiol Methods* 107:161–168.
- 579 33. Ellington AJ, Bryan NC, Christner BC, Reisch CR. 2021. Draft Genome Sequences of  
580 Actinobacterial and Betaproteobacterial Strains Isolated from the Stratosphere. *Microbiol*  
581 *Resour Announc* 10:e1009-21.
- 582 34. Richter M, Rosselló-Móra R. 2009. Shifting the genomic gold standard for the prokaryotic  
583 species definition. *Proc Natl Acad Sci* 106:19126–19131.
- 584 35. Kim M, Oh H-S, Park S-C, Chun J. 2014. Towards a taxonomic coherence between  
585 average nucleotide identity and 16S rRNA gene sequence similarity for species  
586 demarcation of prokaryotes. *Int J Syst Evol Microbiol* 64:346–351.

- 587 36. Jain C, Rodriguez-R LM, Phillippy AM, Konstantinidis KT, Aluru S. 2018. High  
588 throughput ANI analysis of 90K prokaryotic genomes reveals clear species boundaries.  
589 *Nat Commun* 9:1–8.
- 590 37. Ciufu S, Kannan S, Sharma S, Badretdin A, Clark K, Turner S, Brover S, Schoch CL,  
591 Kimchi A, DiCuccio M. 2018. Using average nucleotide identity to improve taxonomic  
592 assignments in prokaryotic genomes at the NCBI. *Int J Syst Evol Microbiol* 68:2386–  
593 2392.
- 594 38. Bagyan I, Casillas-Martinez L, Setlow P. 1998. The *katX* gene, which codes for the  
595 catalase in spores of *Bacillus subtilis*, is a forespore-specific gene controlled by  $\sigma(F)$ , and  
596 *katX* is essential for hydrogen peroxide resistance of the germinating spore. *J Bacteriol*  
597 180:2057–2062.
- 598 39. Bol DK, Yasbin RE. 1991. The isolation, cloning and identification of a vegetative  
599 catalase gene from *Bacillus subtilis*. *Gene* 109:31–37.
- 600 40. Deatherage DE, Barrick JE. 2014. Identification of mutations in laboratory-evolved  
601 microbes from next-generation sequencing data using breseq. *Methods in Molecular*  
602 *Biology* 1151:165–188.
- 603 41. Daly MJ, Gaidamakova EK, Matrosova VY, Vasilenko A, Zhai M, Leapman RD, Lai B,  
604 Ravel B, Li SMW, Kemner KM, Fredrickson JK. 2007. Protein oxidation implicated as  
605 the primary determinant of bacterial radioresistance. *PLoS Biol* 5:769–779.
- 606 42. Daly MJ, Gaidamakova EK, Matrosova VY, Kiang JG, Fukumoto R, Lee DY, Wehr NB,  
607 Viteri GA, Berlett BS, Levine RL. 2010. Small-molecule antioxidant proteome-shields in  
608 *Deinococcus radiodurans*. *PLoS One* 5:10–15.
- 609 43. Krisko A, Radman M. 2010. Protein damage and death by radiation in *Escherichia coli*  
610 and *Deinococcus radiodurans*. *Proc Natl Acad Sci U S A* 107:14373–14377.
- 611 44. Sancar A. 1994. Structure and function of DNA photolyase. *Biochemistry* 33:2–9.
- 612 45. Oberpichler I, Pierik AJ, Wesslowski J, Pokorny R, Rosen R, Vugman M, Zhang F,  
613 Neubauer O, Ron EZ, Batschauer A, Lamparter T. 2011. A Photolyase-Like Protein from  
614 *Agrobacterium tumefaciens* with an Iron-Sulfur Cluster. *PLoS One* 6:e26775.
- 615 46. Marizcurrena JJ, Morel MA, Braña V, Morales D, Martínez-López W, Castro-Sowinski S.  
616 2017. Searching for novel photolyases in UVC-resistant Antarctic bacteria. *Extremophiles*  
617 21:409–418.
- 618 47. Portero LR, Alonso-Reyes DG, Zannier F, Vazquez MP, Farías ME, Gärtner W,  
619 Albarracín VH. 2019. Photolyases and Cryptochromes in UV-resistant Bacteria from  
620 High-altitude Andean Lakes. *Photochem Photobiol* 95:315–330.
- 621 48. Aguilera Á, Diego-Castilla G de, Osuna S, Bardera R, Mendi SS, Blanco Y, González-  
622 Toril E, Aguilera Á, Diego-Castilla G de, Osuna S, Bardera R, Mendi SS, Blanco Y,  
623 González-Toril E. 2018. *Microbial Ecology in the Atmosphere: The Last Extreme*

- 624 Environment. Extremophilic Microbes and Metabolites - Diversity, Bioprospecting and  
625 Biotechnological Applications <https://doi.org/10.5772/INTECHOPEN.81650>.
- 626 49. Šantl-Temkiv T, Amato P, Casamayor EO, Lee PKH, Pointing SB. 2022. Microbial  
627 ecology of the atmosphere. *FEMS Microbiol Rev* 46:1–18.
- 628 50. Schuerger AC, Mancinelli RL, Kern RG, Rothschild LJ, McKay CP. 2003. Survival of  
629 endospores of *Bacillus subtilis* on spacecraft surfaces under simulated Martian  
630 environments: implications for the forward contamination of Mars. *Icarus* 165:253–276.
- 631 51. Tauscher C, Schuerger AC, Nicholson WL. 2006. Survival and Germinability of *Bacillus*  
632 *subtilis* Spores Exposed to Simulated Mars Solar Radiation: Implications for Life  
633 Detection and Planetary Protection. *Astrobiology* 6:592–605.
- 634 52. Schuerger AC, Richards JT, Newcombe DA, Venkateswaran K. 2006. Rapid inactivation  
635 of seven *Bacillus* spp. under simulated Mars UV irradiation. *Icarus* 181:52–62.
- 636 53. Cockell CS, Schuerger AC, Billi D, Friedmann EI, Panitz C. 2005. Effects of a Simulated  
637 Martian UV Flux on the Cyanobacterium, *Chroococcidiopsis* sp. 029. *Astrobiology*  
638 5:127–140.
- 639 54. Diaz B, Schulze-Makuch D. 2006. Microbial Survival Rates of *Escherichia coli* and  
640 *Deinococcus radiodurans* Under Low Temperature, Low Pressure, and UV-Irradiation  
641 Conditions, and Their Relevance to Possible Martian Life. *Astrobiology* 6:332–347.
- 642 55. de la Vega UP, Rettberg P, Reitz G. 2007. Simulation of the environmental climate  
643 conditions on Martian surface and its effect on *Deinococcus radiodurans*. *Advances in*  
644 *Space Research* 40:1672–1677.
- 645 56. Fendrihan S, Bérces A, Lammer H, Musso M, Rontó G, Polacsek TK, Holzinger A, Kolb  
646 C, Stan-Lotter H. 2009. Investigating the Effects of Simulated Martian Ultraviolet  
647 Radiation on *Halococcus dombrowskii* and Other Extremely Halophilic Archaeobacteria.  
648 *Astrobiology* 9:104–112.
- 649 57. Peeters Z, Vos D, ten Kate IL, Selch F, van Sluis CA, Sorokin DY, Muijzer G, Stan-Lotter  
650 H, van Loosdrecht MCM, Ehrenfreund P. 2010. Survival and death of the haloarchaeon  
651 *Natronorubrum* strain HG-1 in a simulated Martian environment. *Advances in Space*  
652 *Research* 46:1149–1155.
- 653 58. Johnson AP, Pratt LM, Vishnivetskaya T, Pfiffner S, Bryan RA, Dadachova E, Whyte L,  
654 Radtke K, Chan E, Tronick S, Borgonie G, Mancinelli RL, Rothschild LJ, Rogoff DA,  
655 Horikawa DD, Onstott TC. 2011. Extended survival of several organisms and amino acids  
656 under simulated Martian surface conditions. *Icarus* 211:1162–1178.
- 657 59. Smith DJ, Schuerger AC, Davidson MM, Pacala SW, Bakermans C, Onstott TC. 2009.  
658 Survivability of *Psychrobacter cryohalolentis* K5 Under Simulated Martian Surface  
659 Conditions. *Astrobiology* 9:221–228.

- 660 60. Khodadad CL, Wong GM, James LM, Thakrar PJ, Lane MA, Catechis JA, Smith DJ.  
661 2017. Stratosphere Conditions Inactivate Bacterial Endospores from a Mars Spacecraft  
662 Assembly Facility. *Astrobiology* 17:337.
- 663 61. Ye T, Wang B, Li C, Bian P, Chen L, Wang G. 2021. Exposure of cyanobacterium *Nostoc*  
664 sp. to the Mars-like stratosphere environment. *J Photochem Photobiol* 224:112307.
- 665 62. Berens PJT, Molinier J. 2020. Formation and Recognition of UV-Induced DNA Damage  
666 within Genome Complexity. *Int J Mol Sci* 21:1–23.
- 667 63. Sundin GW, Jacobs JL. 1999. Ultraviolet Radiation (UVR) Sensitivity Analysis and UVR  
668 Survival Strategies of a Bacterial Community from the Phyllosphere of Field-Grown  
669 Peanut (*Arachis hypogaeae* L.). *Microb Ecol* 38:27–38.
- 670 64. Kuhlman KR, Allenbach LB, Ball CL, Fusco WG, la Duc MT, Kuhlman GM, Anderson  
671 RC, Stuecker T, Erickson IK, Benardini J, Crawford RL. 2005. Enumeration, isolation,  
672 and characterization of ultraviolet (UV-C) resistant bacteria from rock varnish in the  
673 Whipple Mountains, California. *Icarus* 174:585–595.
- 674 65. Bauermeister A, Bentchikou E, Moeller R, Rettberg P. 2009. Roles of PprA, IrrE, and  
675 RecA in the resistance of *Deinococcus radiodurans* to germicidal and environmentally  
676 relevant UV radiation. *Arch Microbiol* 191:913–918.
- 677 66. Jiang D, Hatahet Z, Melamede RJ, Kow YW, Wallace SS. 1997. Characterization of  
678 *Escherichia coli* Endonuclease VIII. *Journal of Biological Chemistry* 272:32230–32239.
- 679 67. Dizdaroglu M. 2003. Substrate specificities and excision kinetics of DNA glycosylases  
680 involved in base-excision repair of oxidative DNA damage. *Mutation*  
681 *Research/Fundamental and Molecular Mechanisms of Mutagenesis* 531:109–126.
- 682 68. Veaute X, Delmas S, Selva M, Jeusset J, Le Cam E, Matic I, Fabre F, Petit MA. 2005.  
683 UvrD helicase, unlike Rep helicase, dismantles RecA nucleoprotein filaments in  
684 *Escherichia coli*. *EMBO J* 24:180.
- 685 69. Husain I, van Houten B, Thomas DC, Abdel-Monem M, Sancar A. 1985. Effect of DNA  
686 polymerase I and DNA helicase II on the turnover rate of UvrABC excision nuclease.  
687 *Proc Natl Acad Sci* 82:6774–6778.
- 688 70. Dao V, Modrich P. 1998. Mismatch-, MutS-, MutL-, and helicase II-dependent unwinding  
689 from the single-strand break of an incised heteroduplex. *J Biol Chem* 273:9202–9207.
- 690 71. Petit MA, Dervyn E, Rose M, Entian KD, McGovern S, Ehrlich SD, Bruand C. 1998.  
691 PcrA is an essential DNA helicase of *Bacillus subtilis* fulfilling functions both in repair  
692 and rolling-circle replication. *Mol Microbiol* 29:261–273.
- 693 72. Newton GL, Arnold K, Price MS, Sherrill C, Delcardayre SB, Aharonowitz Y, Cohen G,  
694 Davies J, Fahey RC, Davis C. 1996. Distribution of thiols in microorganisms: mycothiol is  
695 a major thiol in most actinomycetes. *J Bacteriol* 178:1990–1995.

- 696 73. Jordan A, Åslund F, Pontis E, Reichard P, Holmgren A. 1997. Characterization of  
697 Escherichia coli NrdH: A GLUTAREDOXIN-LIKE PROTEIN WITH A  
698 THIOREDOXIN-LIKE ACTIVITY PROFILE \*. Journal of Biological Chemistry  
699 272:18044–18050.
- 700 74. Van Laer K, Dziejulska AM, Fislage M, Wahni K, Hbeddou A, Collet JF, Versées W,  
701 Mateos LM, Dufe VT, Messens J. 2013. NrdH-redoxin of Mycobacterium tuberculosis  
702 and Corynebacterium glutamicum Dimerizes at High Protein Concentration and  
703 Exclusively Receives Electrons from Thioredoxin Reductase. J Biol Chem 288:7942.
- 704 75. Si MR, Zhang L, Yang ZF, Xu YX, Liu YB, Jiang CY, Wang Y, Shen XH, Liu SJ. 2014.  
705 NrdH redoxin enhances resistance to multiple oxidative stresses by acting as a peroxidase  
706 cofactor in Corynebacterium glutamicum. Appl Environ Microbiol 80:1750–1762.
- 707 76. Moeller R, Setlow P, Reitz G, Nicholson WL. 2009. Roles of small, acid-soluble spore  
708 proteins and core water content in survival of Bacillus subtilis spores exposed to  
709 environmental solar UV radiation. Appl Environ Microbiol 75:5202–5208.
- 710 77. Singh H. 2018. Desiccation and radiation stress tolerance in cyanobacteria. J Basic  
711 Microbiol 58:813–826.
- 712 78. Romano I, Camerlingo C, Vaccari L, Birarda G, Poli A, Fujimori A, Lepore M, Moeller  
713 R, Di Donato P. 2022. Effects of Ionizing Radiation and Long-Term Storage on Hydrated  
714 vs. Dried Cell Samples of Extremophilic Microorganisms. Microorganisms 2022, Vol 10,  
715 Page 190 10:190.
- 716 79. Rainey F, Ray K, Ferreira M, Gatz B, Nobre M, Bagaley D, Rash B, Park M, Earl A,  
717 Shank N, Small A, Henk M, Battista J, Kämpfer P, da Costa M. 2005. Extensive diversity  
718 of ionizing-radiation-resistant bacteria recovered from Sonoran Desert soil and description  
719 of nine new species of the genus Deinococcus obtained from a single soil sample. Appl  
720 Environ Microbiol 71:5225–5235.
- 721 80. Slade D, Radman M. 2011. Oxidative Stress Resistance in Deinococcus radiodurans.  
722 Microbiology and Molecular Biology Reviews 75:133–191.
- 723 81. Kottemann M, Kish A, Iloanusi C, Bjork S, DiRuggiero J. 2005. Physiological responses  
724 of the halophilic archaeon Halobacterium sp. strain NRC1 to desiccation and gamma  
725 irradiation. Extremophiles 9:219–227.
- 726 82. Shukla M, Chaturvedi R, Tamhane D, Vyas P, Archana G, Apte S, Bandekar J, Desai A.  
727 2007. Multiple-stress tolerance of ionizing radiation-resistant bacterial isolates obtained  
728 from various habitats: correlation between stresses. Curr Microbiol 54:142–148.
- 729 83. Romanovskaya VA, Rokitko P v., Mikheev AN, Gushcha NI, Malashenko YR, Chernaya  
730 NA. 2002. The Effect of  $\gamma$ -Radiation and Desiccation on the Viability of the Soil Bacteria  
731 Isolated from the Alienated Zone around the Chernobyl Nuclear Power Plant.  
732 Microbiology (N Y) 71:608–613.

- 733 84. Musilova M, Wright G, Ward JM, Dartnell LR. 2015. Isolation of Radiation-Resistant  
734 Bacteria from Mars Analog Antarctic Dry Valleys by Preselection, and the Correlation  
735 between Radiation and Desiccation Resistance. *Astrobiology* 15:1076.
- 736 85. Mattimore V, Battista JR. 1996. Radioresistance of *Deinococcus radiodurans*: functions  
737 necessary to survive ionizing radiation are also necessary to survive prolonged  
738 desiccation. *J Bacteriol* 178:633.
- 739 86. Santos AL, Oliveira V, Baptista I, Henriques I, Gomes NCM, Almeida A, Correia A,  
740 Cunha Â. 2013. Wavelength dependence of biological damage induced by UV radiation  
741 on bacteria. *Arch Microbiol* 195:63–74.
- 742 87. Fredrickson JK, Li SW, Gaidamakova EK, Matrosova VY, Zhai M, Sulloway HM,  
743 Scholten JC, Brown MG, Balkwill DL, Daly MJ. 2008. Protein oxidation: key to bacterial  
744 desiccation resistance? *ISME J* 2:393–403.
- 745 88. Daly MJ, Gaidamakova EK, Matrosova VY, Vasilenko A, Zhai M, Leapman RD, Lai B,  
746 Ravel B, Li SMW, Kemner KM, Fredrickson JK. 2007. Protein Oxidation Implicated as  
747 the Primary Determinant of Bacterial Radioresistance. *PLoS Biol* 5:769–779.
- 748 89. Liu J, Song M, Wei X, Zhang H, Bai Z, Zhuang X. 2022. Responses of Phyllosphere  
749 Microbiome to Ozone Stress: Abundance, Community Compositions and Functions.  
750 *Microorganisms* 10:680.
- 751 90. 2023. NASA Ozone Watch: Latest status of ozone.  
752 <https://ozonewatch.gsfc.nasa.gov/SH.html>. Retrieved 19 March 2023.
- 753 91. Kisker C, Kuper J, van Houten B. 2013. Prokaryotic Nucleotide Excision Repair. *Cold*  
754 *Spring Harb Perspect Biol* 5:a012591.
- 755 92. Todo T, Takemori H, Ryo H, Lhara M, Matsunaga T, Nikaido O, Sato K, Nomura T.  
756 1993. A new photoreactivating enzyme that specifically repairs ultraviolet light-induced  
757 (6-4) photoproducts. *Nature* 361:371–374.
- 758 93. Zhang F, Scheerer P, Oberpichler I, Lamparter T, Krauß N. 2013. Crystal structure of a  
759 prokaryotic (6-4) photolyase with an Fe-S cluster and a 6,7-dimethyl-8-ribityllumazine  
760 antenna chromophore. *Proc Natl Acad Sci* 110:7217–7222.
- 761 94. Lassalle F, Campillo T, Vial L, Baude J, Costechareyre D, Chapulliot D, Shams M,  
762 Abrouk D, Lavire C, Oger-Desfeux C, Hommais F, Guéguen L, Daubin V, Muller D,  
763 Nesme X. 2011. Genomic species are ecological species as revealed by comparative  
764 genomics in *Agrobacterium tumefaciens*. *Genome Biol Evol* 3:762–781.
- 765 95. Geisselbrecht Y, Frühwirth S, Schroeder C, Pierik AJ, Klug G, Essen LO. 2012. CryB  
766 from *Rhodobacter sphaeroides*: a unique class of cryptochromes with new cofactors.  
767 *EMBO Rep* 13:223–229.
- 768 96. von Zadow A, Ignatz E, Pokorny R, Essen LO, Klug G. 2016. *Rhodobacter sphaeroides*  
769 CryB is a bacterial cryptochrome with (6-4) photolyase activity. *FEBS J* 283:4291–4309.

- 770 97. Hördt A, López MG, Meier-Kolthoff JP, Schleuning M, Weinhold LM, Tindall BJ,  
771 Gronow S, Kyrpides NC, Woyke T, Göker M. 2020. Analysis of 1,000+ Type-Strain  
772 Genomes Substantially Improves Taxonomic Classification of Alphaproteobacteria. *Front*  
773 *Microbiol* 11:468.
- 774 98. Dikbas UM, Tardu M, Canturk A, Gul S, Ozcelik G, Baris I, Ozturk N, Kavakli IH. 2019.  
775 Identification and Characterization of a New Class of (6-4) Photolyase from *Vibrio*  
776 *cholerae*. *Biochemistry* 58:4352–4360.
- 777 99. Douki T, Cadet J. 2001. Individual determination of the yield of the main UV-induced  
778 dimeric pyrimidine photoproducts in DNA suggests a high mutagenicity of CC  
779 photolesions. *Biochemistry* 40:2495–2501.
- 780 100. Wu D, Lai W, Lyu C, Hang H, Wang H. 2018. UHPLC-Q-TOF/MS detection of UV-  
781 induced TpT dimeric lesions in genomic DNA. *J Chromatogr* 1096:135–142.
- 782 101. Banaś AK, Zgłobicki P, Kowalska E, Bażant A, Dziga D, Strzałka W. 2020. All You  
783 Need Is Light. Photorepair of UV-Induced Pyrimidine Dimers. *Genes (Basel)* 11:1304.
- 784 102. Kolmogorov M, Yuan J, Lin Y, Pevzner PA. 2019. Assembly of long, error-prone reads  
785 using repeat graphs. *Nat Biotechnol* 37:540–546.
- 786 103. Tatusova T, DiCuccio M, Badretdin A, Chetvernin V, Nawrocki E, Zaslavsky L,  
787 Lomsadze A, Pruitt K, Borodovsky M, Ostell J. 2016. NCBI prokaryotic genome  
788 annotation pipeline. *Nucleic Acids Res* 44:6614–6624.
- 789 104. Rodriguez-R LM, Konstantinidis KT. 2014. Bypassing Cultivation to Identify Bacterial  
790 Species Culture-independent genomic approaches identify credibly distinct clusters, avoid  
791 cultivation bias, and provide true insights into microbial species. *Microbe Magazine*  
792 9:111–118.
- 793 105. Rodriguez-R LM, Konstantinidis KT. 2016. The enveomics collection: a toolbox for  
794 specialized analyses of microbial genomes and metagenomes. *PeerJ Prepr* 4:e1900v1.
- 795 106. Aziz RK, Bartels D, Best AA, DeJongh M, Disz T, Edwards RA, Formsma K, Gerdes S,  
796 Glass EM, Kubal M, Meyer F, Olsen GJ, Olson R, Osterman AL, Overbeek RA, McNeil  
797 LK, Paarmann D, Paczian T, Parrello B, Pusch GD, Reich C, Stevens R, Vassieva O,  
798 Vonstein V, Wilke A, Zagnitko O. 2008. The RAST Server: Rapid Annotations using  
799 Subsystems Technology. *BMC Genomics* 9:75.
- 800 107. Overbeek R, Olson R, Pusch GD, Olsen GJ, Davis JJ, Disz T, Edwards RA, Gerdes S,  
801 Parrello B, Shukla M, Vonstein V, Wattam AR, Xia F, Stevens R. 2014. The SEED and  
802 the Rapid Annotation of microbial genomes using Subsystems Technology (RAST).  
803 *Nucleic Acids Res* 42:D206.
- 804 108. Brettin T, Davis JJ, Disz T, Edwards RA, Gerdes S, Olsen GJ, Olson R, Overbeek R,  
805 Parrello B, Pusch GD, Shukla M, Thomason JA, III, Stevens R, Vonstein V, Wattam AR,

- 806 Xia F. 2015. RASTtk: A modular and extensible implementation of the RAST algorithm  
807 for building custom annotation pipelines and annotating batches of genomes. *Sci Rep* 5.
- 808 109. Madden T. 2002. The BLAST Sequence Analysis Tool. *The NCBI Handbook* 1–15.
- 809 110. Consortium TU, Bateman A, Martin M-J, Orchard S, Magrane M, Agivetova R, Ahmad S,  
810 Alpi E, Bowler-Barnett EH, Britto R, Bursteinas B, Bye-A-Jee H, Coetzee R, Cukura A,  
811 Da Silva A, Denny P, Dogan T, Ebenezer T, Fan J, Castro LG, Garmiri P, Georghiou G,  
812 Gonzales L, Hatton-Ellis E, Hussein A, Ignatchenko A, Insana G, Ishtiaq R, Jokinen P,  
813 Joshi V, Jyothi D, Lock A, Lopez R, Luciani A, Luo J, Lussi Y, MacDougall A, Madeira  
814 F, Mahmoudy M, Menchi M, Mishra A, Moulang K, Nightingale A, Oliveira CS, Pundir  
815 S, Qi G, Raj S, Rice D, Lopez MR, Saidi R, Sampson J, Sawford T, Speretta E, Turner E,  
816 Tyagi N, Vasudev P, Volynkin V, Warner K, Watkins X, Zaru R, Zellner H, Bridge A,  
817 Poux S, Redaschi N, Aimo L, Argoud-Puy G, Auchincloss A, Axelsen K, Bansal P,  
818 Baratin D, Blatter M-C, Bolleman J, Boutet E, Breuza L, Casals-Casas C, de Castro E,  
819 Echioukh KC, Coudert E, Cuhe B, Doche M, Dornevil D, Estreicher A, Famiglietti ML,  
820 Feuermann M, Gasteiger E, Gehant S, Gerritsen V, Gos A, Gruaz-Gumowski N, Hinz U,  
821 Hulo C, Hyka-Nouspikel N, Jungo F, Keller G, Kerhornou A, Lara V, Le Mercier P,  
822 Lieberherr D, Lombardot T, Martin X, Masson P, Morgat A, Neto TB, Paesano S,  
823 Pedruzzi I, Pilbout S, Pourcel L, Pozzato M, Pruess M, Rivoire C, Sigrist C, Sonesson K,  
824 Stutz A, Sundaram S, Tognolli M, Verbregue L, Wu CH, Arighi CN, Arminski L, Chen C,  
825 Chen Y, Garavelli JS, Huang H, Laiho K, McGarvey P, Natale DA, Ross K, Vinayaka  
826 CR, Wang Q, Wang Y, Yeh L-S, Zhang J, Ruch P, Teodoro D. 2021. UniProt: the  
827 universal protein knowledgebase in 2021. *Nucleic Acids Res* 49:D480–D489.
- 828 111. Pearson WR. 2013. An Introduction to Sequence Similarity (“Homology”) Searching.  
829 *Curr Protoc Bioinformatics* 42:3.1.1-3.1.8.
- 830 112. Alikhan NF, Petty NK, Ben Zakour NL, Beatson SA. 2011. BLAST Ring Image  
831 Generator (BRIG): Simple prokaryote genome comparisons. *BMC Genomics* 12:1–10.
- 832 113. Krueger F. 2021. TrimGalore: A wrapper around Cutadapt and FastQC to consistently  
833 apply adapter and quality trimming to FastQ files, with extra functionality for RRBS data.  
834 GitHub.
- 835 114. Götz S, García-Gómez JM, Terol J, Williams TD, Nagaraj SH, Nueda MJ, Robles M,  
836 Talón M, Dopazo J, Conesa A. 2008. High-throughput functional annotation and data  
837 mining with the Blast2GO suite. *Nucleic Acids Res* 36:3420–3435.
- 838
- 839
- 840



841 **Fig. 1. Comparison of phylogenetic relatedness among the bacterial strains and their**  
842 **tolerance to UVCR. (A)** Maximum-likelihood analysis of 16S rRNA gene sequences from the  
843 stratospheric isolates and closely related strains. UVCR tolerance of the **(B)** actinobacterial and  
844 **(C)** betaproteobacterial strains based on the surviving number of cells (N) at each UVCR dose  
845 divided by that in unexposed populations ( $N_0$ ). The values plotted are averages from three  
846 independent replicates. Error bars represent SEM.

847

848 **Fig. 2. DNA repair and ROS detoxification genes in *Curtobacterium* sp. L6-1 not found in**  
849 **strain DSM 20129.** Genomes were compared using the BLAST Ring Image Generator (BRIG)  
850 with the blastp algorithm. Rings represent the following (from innermost to outermost): **1)** GC  
851 Content, **2)** GC skew of the L6-1 genome, **3)** percent identity to L6-1 of protein orthologs found  
852 in strain DSM 20129, and **4)** DNA repair (**black**) and ROS detoxification (**grey**) genes. Genes  
853 present in L6-1 but absent in DSM 20129 are indicated in **red** text.

854

855 **Fig. 3. DNA repair and ROS detoxification genes in *Noviherbaspirillum* sp. L7-7A not found**  
856 **in strains TSA40 and TSA66.** Genomes were compared using the BLAST Ring Image Generator  
857 (BRIG) with the blastp algorithm. Rings represent the following (from innermost to outermost):  
858 **1)** GC Content, **2)** GC skew of the L7-7A genome, **3)** percent identity to L7-7A of protein  
859 homologs found in strains TSA40 and TSA66, and **4)** DNA repair (**black**) and ROS detoxification  
860 (**grey**) genes. Genes present in L7-7A but absent in both TSA40 and TSA66 are indicated in **red**  
861 text.

862

863

864

865 **Fig. 4. Directed evolution of UVCR tolerance in strain DSM 20129.** **A)** Schematic depiction of  
866 the directed evolution method used to improve UVCR tolerance in strain DSM 20129. The details  
867 of the procedure are described in the text. **B)** UVCR tolerance of DSM 20129 after each round of  
868 UVCR exposure as compared to isolate L6-1, measured as the number of surviving CFUs (N) at  
869 each UVCR dose divided by total number of CFUs in the unexposed control ( $N_0$ ). Data shown are  
870 the average of three independent replicates. Error bars represent SEM. **C)** Summary of the  
871 mutations acquired during the directed evolution process. Mutation type (smaller pie chart) refers  
872 only to the mutations occurring in coding sequences (green slice in larger pie chart). Gene  
873 Ontology (GO) function annotations were determined for proteins that acquired amino acid point  
874 mutations in their coding sequence (blue slice in smaller pie chart).

875

876 **Fig. 5. Cellular ROS concentrations and photolyase activity determination in UVCR treated**  
877 **cells.** **A)** Intracellular ROS concentrations were quantified in the stratospheric isolate (L6-1), the  
878 DSM 20129 wild-type parent (DSM 20129), and UV-evolved strain (DSM-9.3.3) using the free  
879 radical probe H<sub>2</sub>DCFDA. *E. coli* MG1655 and *D. radiodurans* R1 were used as controls and for  
880 comparison. The average of three independent replicates with error bars representing SEM are  
881 plotted. **B)** UVCR survival of strains under dark repair and photoreactivating (light) conditions.  
882 Inset: Percent increase in LD<sub>90</sub> after 1 h incubation in white light vs. dark after UVCR exposure.  
883 The data plotted are averages of four independent replicates with error bars representing SEM. (ns  
884 = not significant; \*\* = P-value < 0.01; \*\*\* = P-value < 0.001; one-way ANOVA and Tukey's post-  
885 test).

886

**Table 1:** General genome features of the stratospheric isolates and closely related reference strains.

| Strain                                         | Chr  | Plasmids | Size (Mbp) | GC % | Genes | rRNA | tRNA | Proteins | ANI (±SD) %  | AAI (±SD) %   |
|------------------------------------------------|------|----------|------------|------|-------|------|------|----------|--------------|---------------|
| <i>Curtobacterium sp.</i> L6-1                 | 1    | 0        | 3.4        | 72.0 | 3,158 | 12   | 46   | 3,072    | 83.64 ± 4.97 | 79.97 ± 13.57 |
| <i>Curtobacterium flaccumfaciens</i> DSM 20129 | 1    | 1        | 3.8        | 70.9 | 3,616 | 9    | 47   | 3,517    | 79.43 ± 4.89 | 65.93 ± 18.08 |
| <i>Noviherbaspirillum denitrificans</i> TSA40  | n.d. | n.d.     | 5.8        | 61.5 | 5,771 | 6    | 51   | 5,446    | 79.24 ± 4.83 | 67.38 ± 17.84 |
| <i>Noviherbaspirillum sp.</i> L7-7A            | 3    | 0        | 5.2        | 62.0 | 4,771 | 15   | 64   | 4,581    |              |               |
| <i>Noviherbaspirillum autotrophicum</i> TSA66  | n.d. | n.d.     | 5.4        | 59.9 | 5,130 | 15   | 59   | 4,980    |              |               |

887

**Table 2:** Mutations acquired in strain DSM 20129 during the directed evolution process.

| Location | Position  | Mutation | Strain of 1 <sup>st</sup> Occurrence |   |   |   |   | Annotation               | Gene/Locus Tag | Description                                    |
|----------|-----------|----------|--------------------------------------|---|---|---|---|--------------------------|----------------|------------------------------------------------|
|          |           |          | WT                                   | 1 | 3 | 6 | 7 |                          |                |                                                |
| Chr      | 7,692     | G→C      | X                                    |   |   |   |   | D180H (GAC→CAC)          | K0028_00025 →  | NAD(P)/FAD-dependent oxidoreductase            |
| Chr      | 72,765    | T→C      |                                      | X |   |   |   | F122L (TTC→CTC)          | trmD →         | tRNA (guanosine(37)-N1)-methyltransferase TrmD |
| Chr      | 160,708   | C→A      |                                      |   | X |   |   | P183T (CCG→ACG)          | K0028_00715 →  | uracil-DNA glycosylase                         |
| Chr      | 205,567   | G→A      |                                      |   |   | X |   | E84K (GAG→AAG)           | prfA →         | peptide chain release factor 1                 |
| Chr      | 217,440   | C→T      |                                      |   |   | X |   | H457Y (CAC→TAC)          | atpD →         | F0F1 ATP synthase subunit beta                 |
| Chr      | 559,194   | C→G      |                                      | X |   |   |   | Q15H (CAG→CAC)           | K0028_02565 ←  | flagellar hook capping protein                 |
| Chr      | 612,632   | C→A      |                                      |   | X |   |   | A37S (GCC→TCC)           | K0028_02820 ←  | RNA polymerase sigma factor                    |
| Chr      | 682,540   | C→G      |                                      |   | X |   |   | A171P (GCC→CCC)          | K0028_03160 ←  | GrpB family protein                            |
| Chr      | 1,015,248 | T→C      |                                      |   | X |   |   | K13R (AAG→AGG)           | K0028_04710 ←  | cold-shock protein                             |
| Chr      | 1,073,811 | G→A      |                                      |   | X |   |   | G170S (GGC→AGC)          | K0028_05010 →  | carbohydrate-binding protein                   |
| Chr      | 1,173,658 | G→T      | X                                    |   |   |   |   | R410L (CGG→CTG)          | K0028_05480 →  | HAMP domain-containing histidine kinase        |
| Chr      | 1,448,846 | G→C      |                                      |   |   | X |   | A343G (GCG→GGG)          | K0028_06725 ←  | transaldolase family protein                   |
| Chr      | 1,750,735 | 2 bp→CT  |                                      |   | X |   |   | coding (162-163/1803 nt) | K0028_08150 ←  | S8 family serine peptidase                     |
| Chr      | 2,439,407 | G→A      |                                      |   | X |   |   | D78N (GAC→AAC)           | K0028_11565 →  | L-serine ammonia-lyase                         |
| Chr      | 2,583,948 | C→A      |                                      |   |   | X |   | V95F (GTC→TTC)           | coaA ←         | type I pantothenate kinase                     |
| Chr      | 2,778,691 | A→G      | X                                    |   |   |   |   | L78P (CTG→CCG)           | K0028_13275 ←  | phosphotransferase                             |
| Chr      | 3,362,910 | A→G      |                                      |   |   | X |   | W367R (TGG→CGG)          | K0028_16065 ←  | DNA photolyase family protein                  |
| Chr      | 3,363,495 | G→T      |                                      |   |   | X |   | P172T (CCC→ACC)          | K0028_16065 ←  | DNA photolyase family protein                  |
| Plasmid  | 42,326    | T→G      |                                      |   |   | X |   | V108G (GTG→GGG)          | K0028_17640 →  | inorganic diphosphatase                        |
| Plasmid  | 63,755    | G→A      | X                                    |   |   |   |   | W396* (TGG→TGA)          | metK →         | methionine adenosyltransferase                 |

888

889

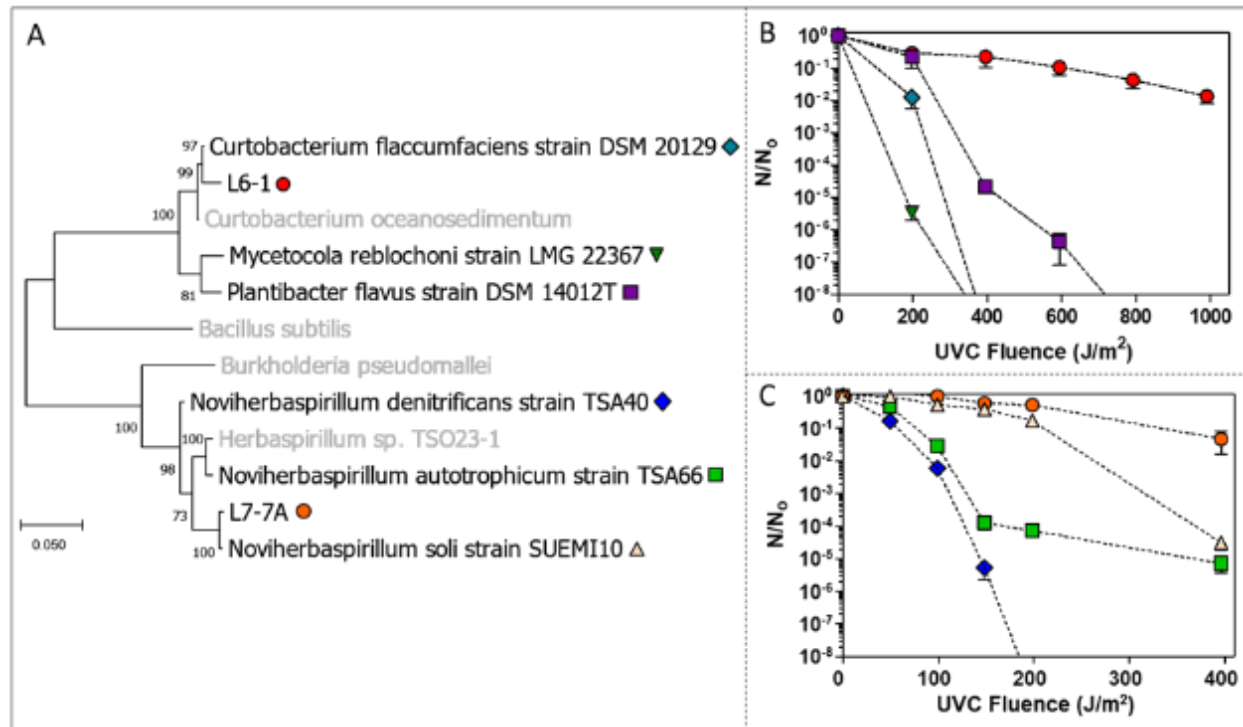

890

891

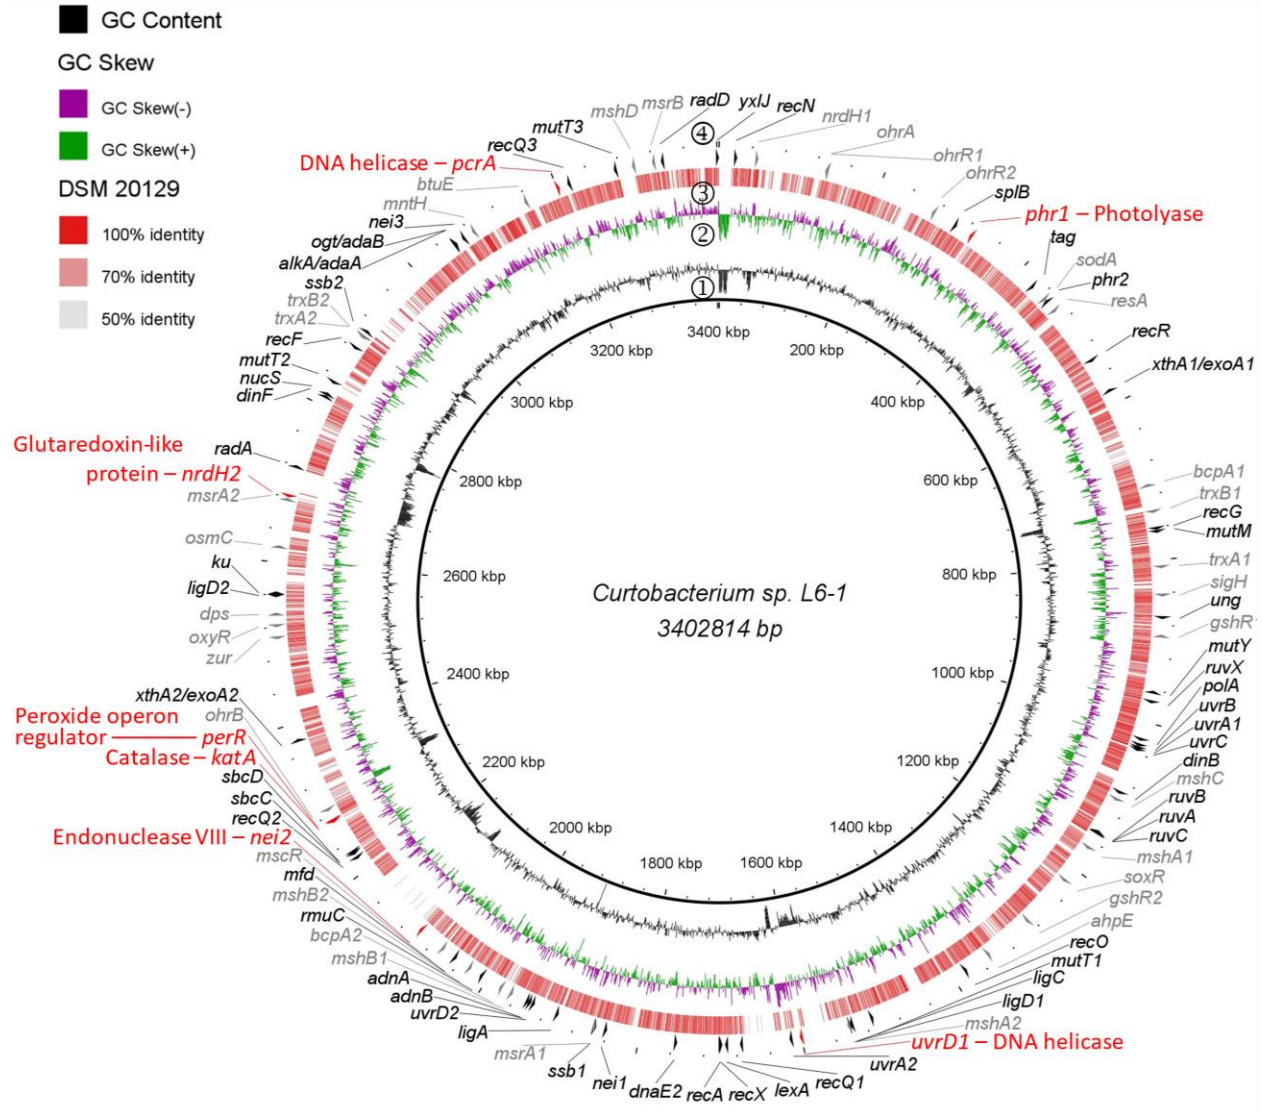

892

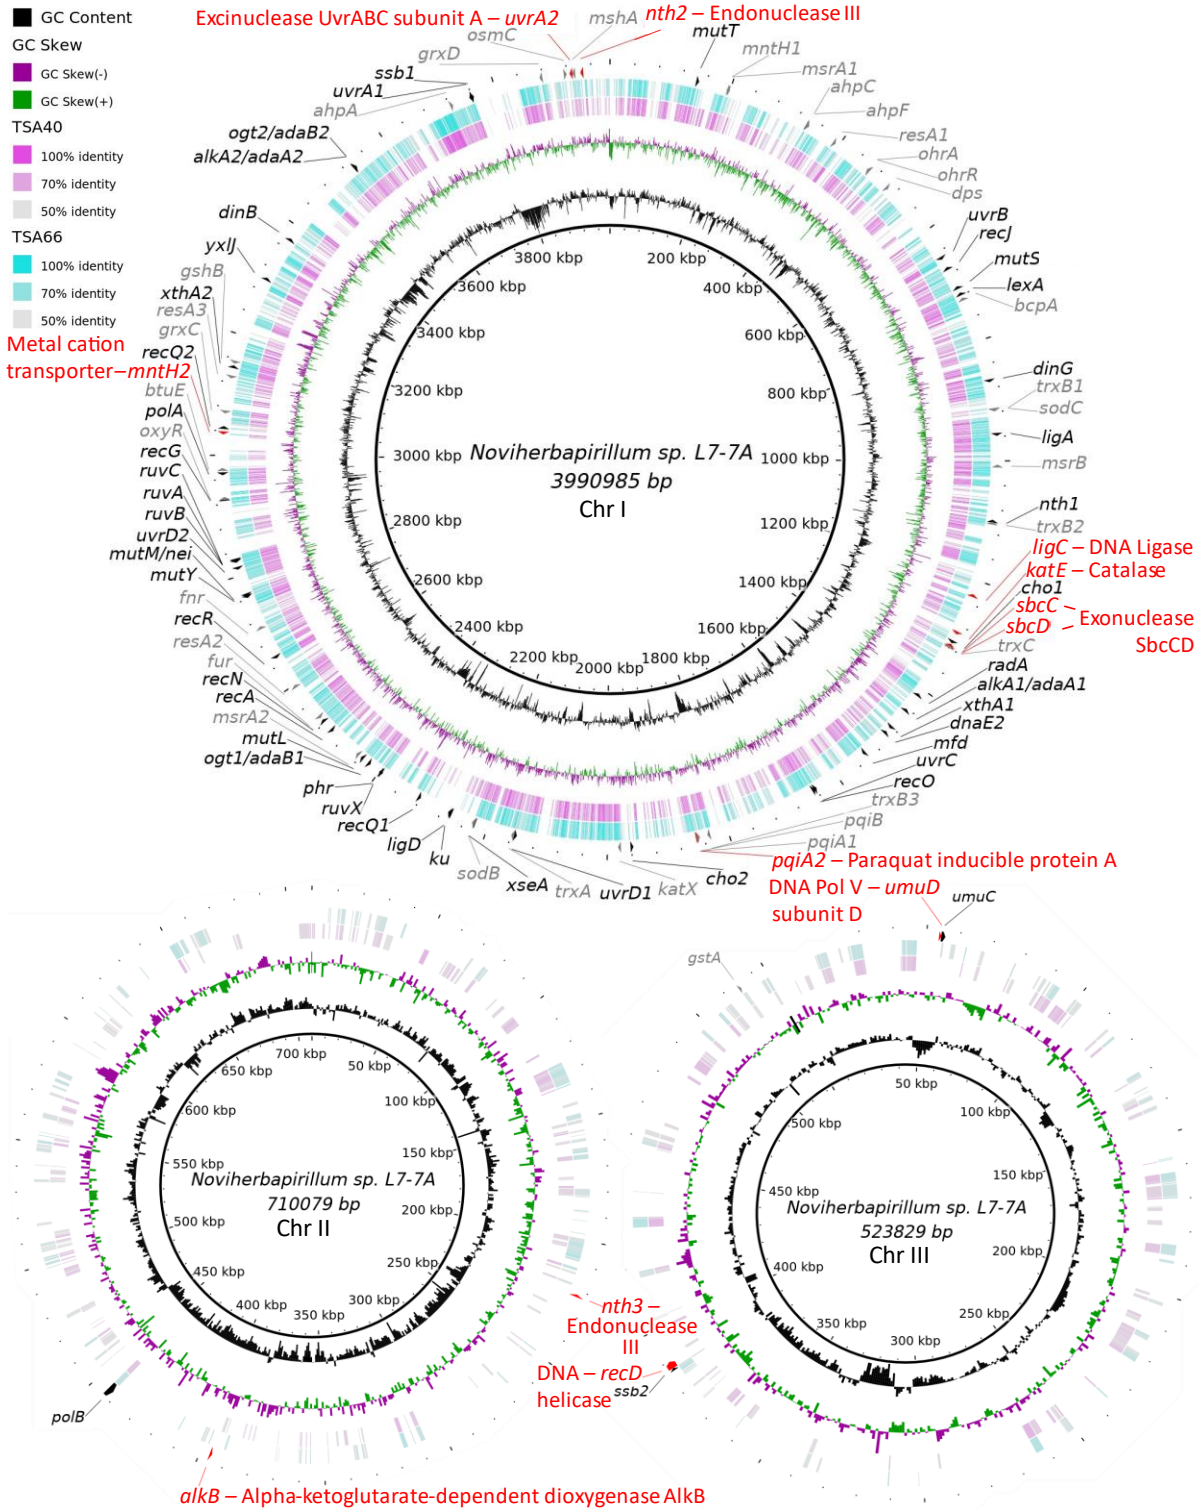

893

894

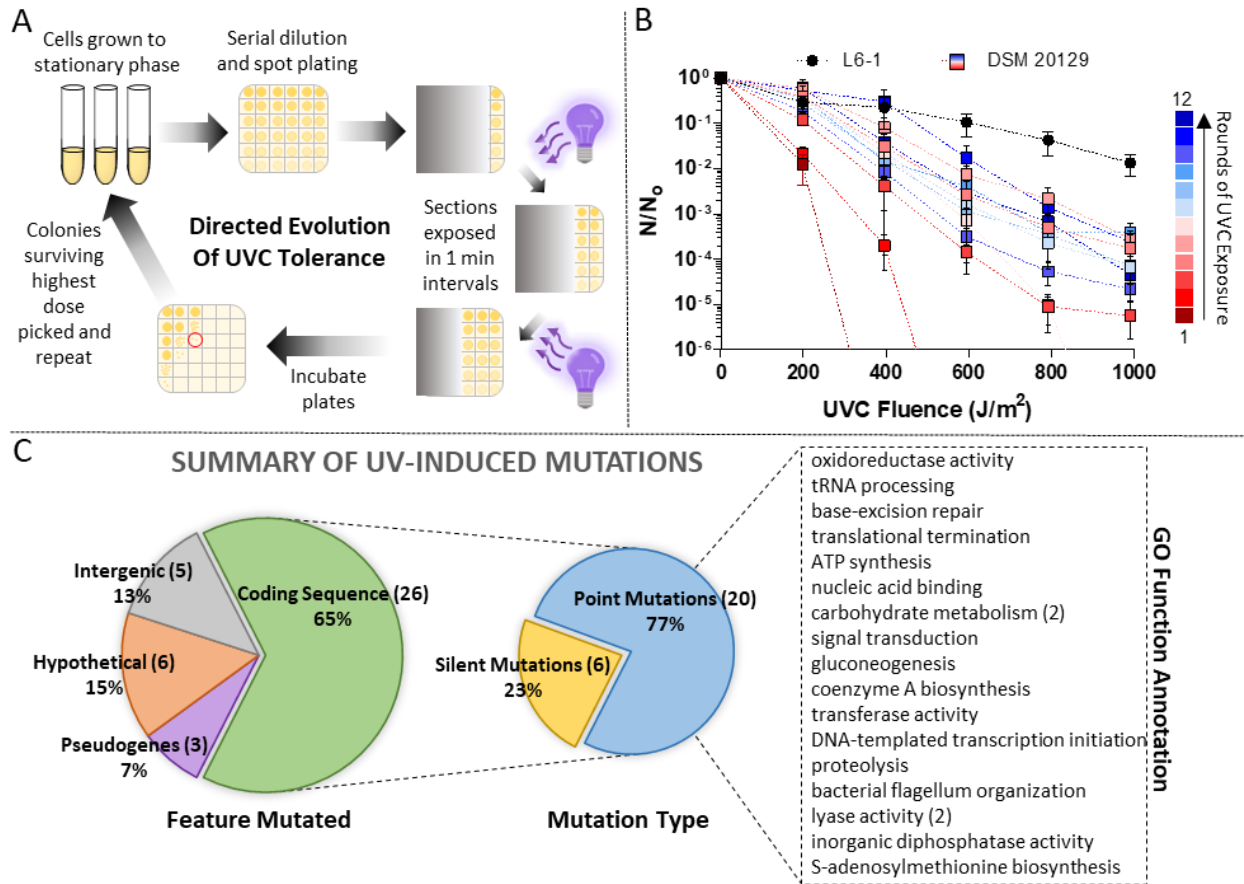

895

896

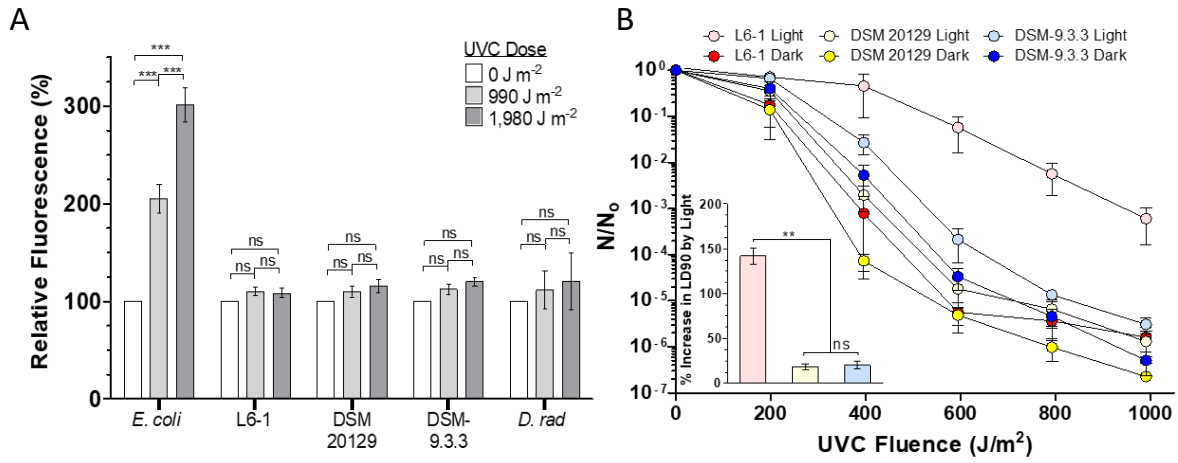

897
